# Supplementary material
Source: PubMed Central journal article supplement (PMC4358779)
Supplement: NIHMS667695-supplement-Supplemental.pdf [file NIHMS667695-supplement-Supplemental.pdf]

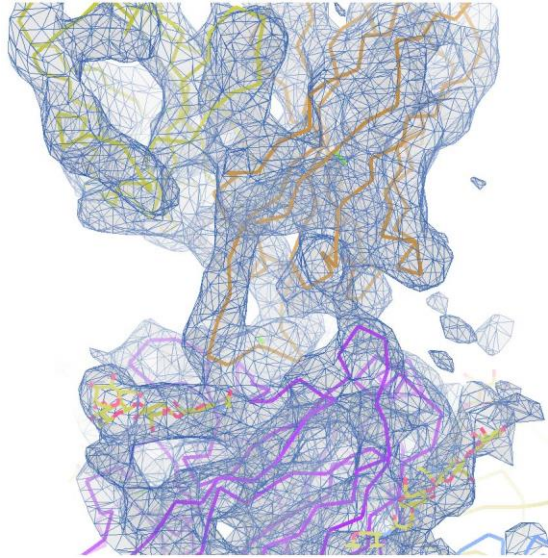

**Supplementary Figure 1 | Representative electron density at the F045-092-Vic2011/H3 interface.** The protein models are depicted as ribbons with the Fab in orange and yellow and the HA in purple. Glycans are represented as sticks. The 2F<sub>o</sub>-F<sub>c</sub> electron density map (blue mesh) is contoured at 1σ.

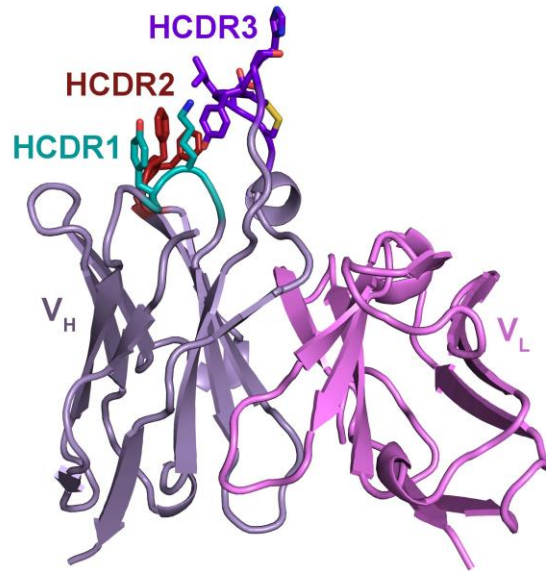

**Supplementary Figure 2 | Fab F045-092 crystal structure depicting the protruding ridge formed by the heavy chain CDRs.** Only the Fab variable domains are illustrated here as a cartoon and residues from the heavy chain CDRs that interact with the HA are labeled and shown as sticks.

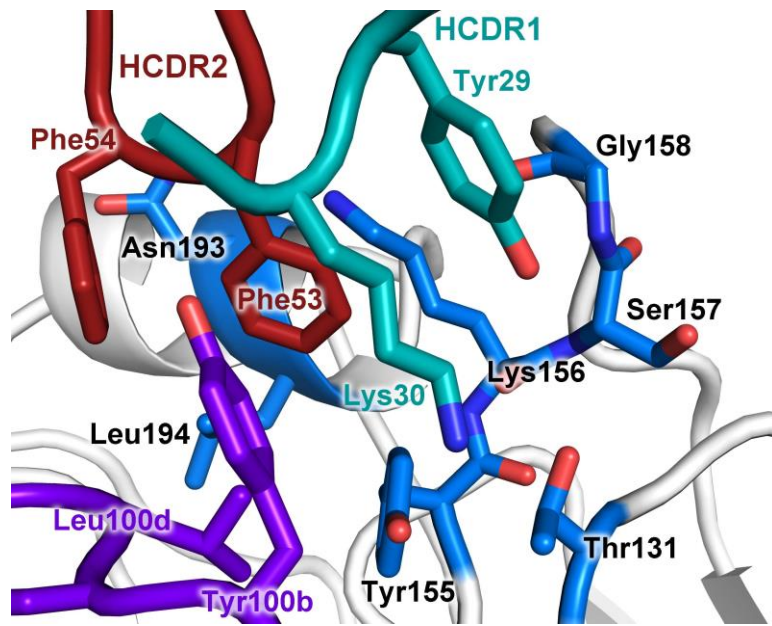

**Supplementary Figure 3 | Interaction of Fab F045-092 with the Vic1975/H3 HA 150 loop and 190 helix.** Contacting residues are colored and shown as sticks.

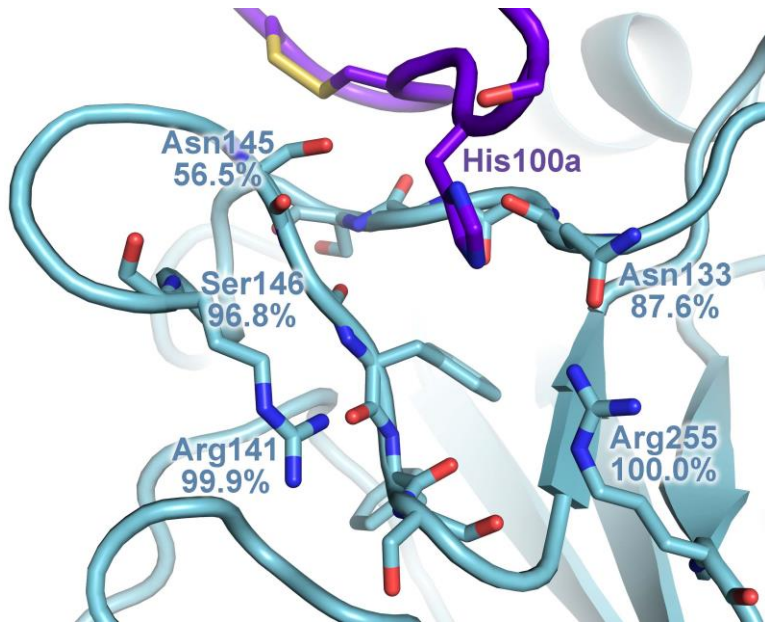

**Supplementary Figure 4 | Conservation of the groove in the HA receptor-binding site formed near the HA 130 and 140 loops.** The percent conservation for the most common H3 residue is labeled and is not always identical to the residue at that position in the Vic1975/H3 sequence. The F045-092 HCDR3 loop, which inserts into this site, is colored purple.

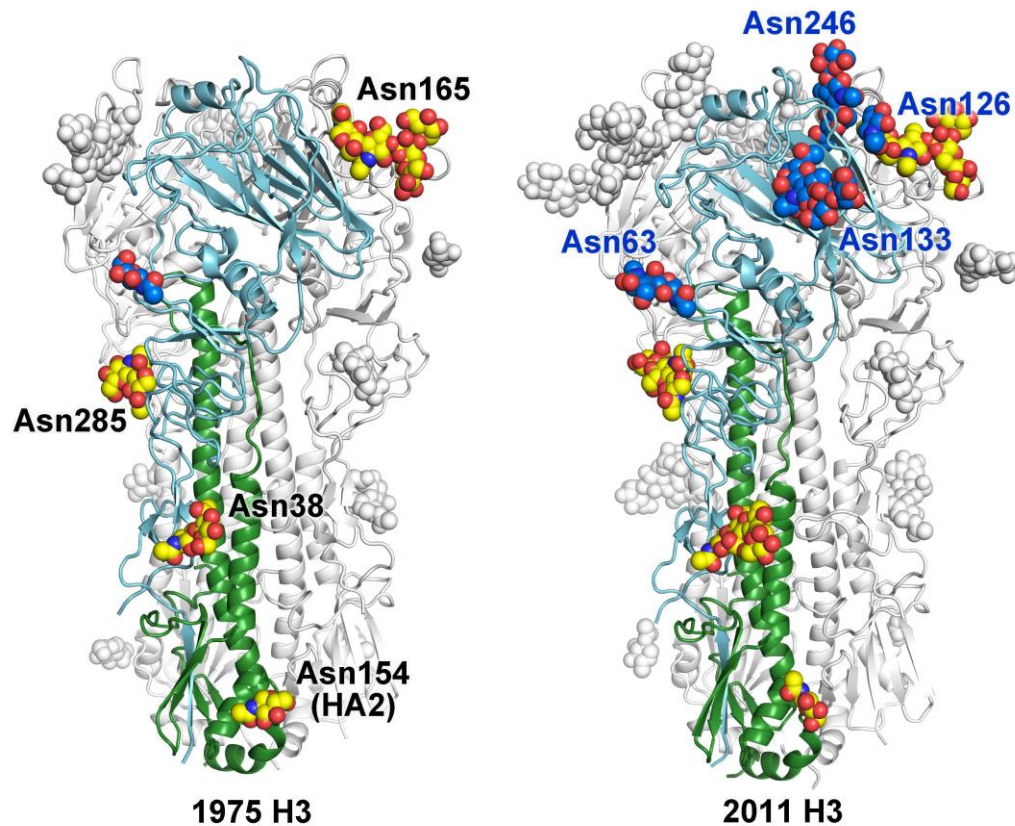

**Supplementary Figure 5 | Additional glycosylation on the HAs of Vic1975/H3 and Vic2011/H3 from the Fab-HA complexes.** Only one HA protomer for each structure is colored. Absolutely conserved PNGs on human H3 HAs are shown as yellow spheres on the Vic1975/H3 structure as well as an additional glycan at Asn63; the PNG at Asn22 was the only conserved glycan not modeled. Further additional PNGs that were accumulated in H3 HAs from 1968-2013 are shown as blue spheres on the Vic2011/H3 structure. The PNGs at Asn positions 45, 122, and 144 were not modeled. Glycans on the other protomers of the trimer are shown in white spheres.

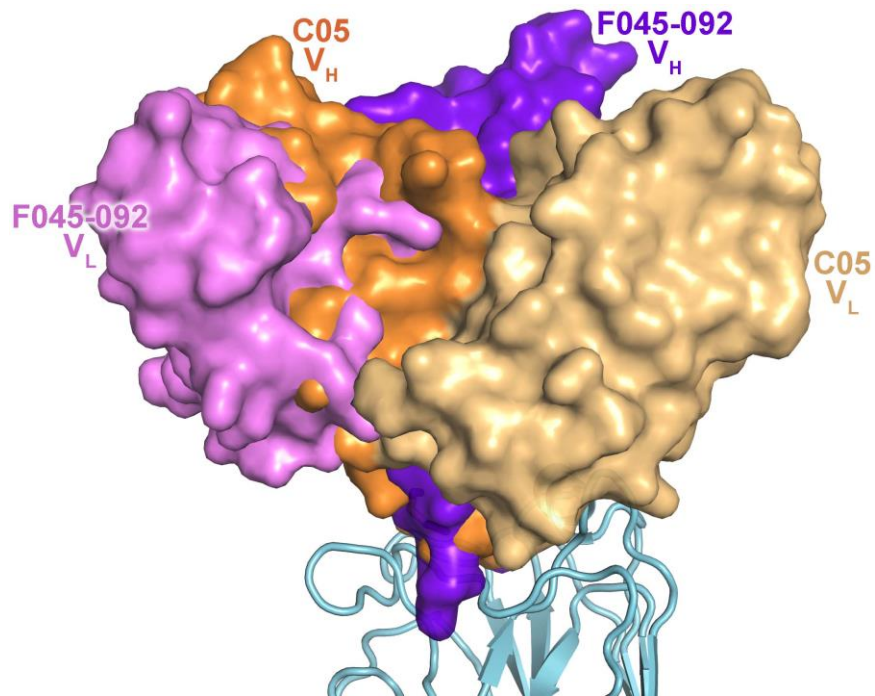

**Supplementary Figure 6 | Comparison of the angle of approach of antibodies F045-092 and C05 on the HA receptor-binding site.** The HAs from the C05-HA (PDB 4FP8) and F045-092-Vic1975/H3 complexes were aligned. Superimposition of the Fab variable domains, depicted as molecular surfaces, of F045-092 and C05 illustrate that the antibodies differ in their approach angle to the HA by  $\sim 113^\circ$ . Only the Vic1975/H3 HA is shown (blue cartoon).



F045-092 Fab vs A/Beijing/262/1995 (H1N1) HA,  $K_d = 820$  nM

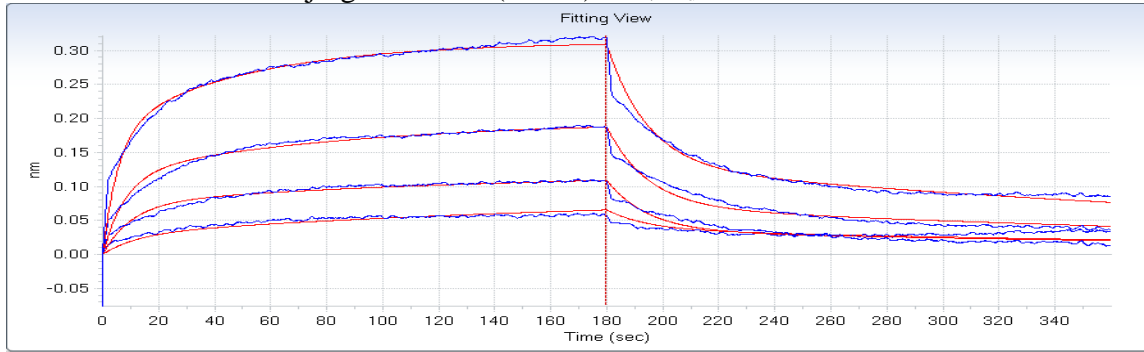

These data were fit with a 2:1 binding model, yielding apparent  $K_{d1} = 1300$  nM and  $K_{d2} = 340$  nM (although  $k_{on}$  and  $k_{off}$  differ for the two binding processes). As these two binding processes have similar affinities, we report the affinity as the average of  $K_{d1}$  and  $K_{d2}$ ,  $\sim 820$  nM.

F045-092 Fab vs A/New Caledonia/20/1999 (H1N1) HA,  $K_d = 540$  nM

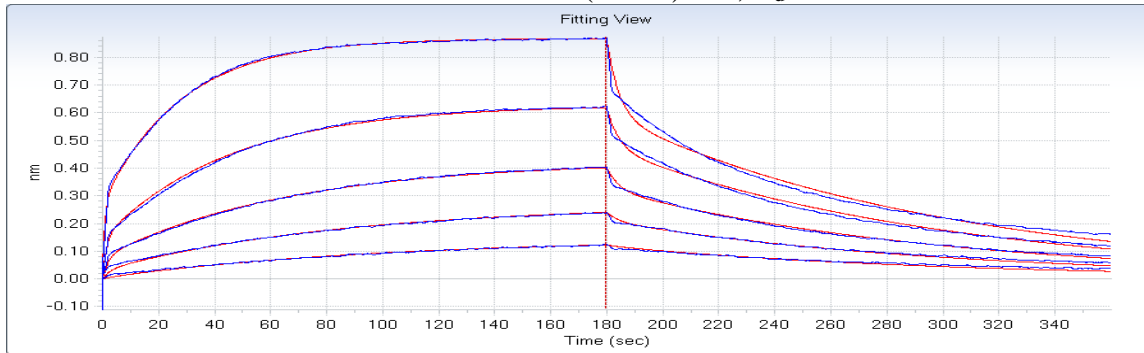

These data were fit with a 2:1 binding model, yielding apparent  $K_{d1} = 610$  nM and  $K_{d2} = 460$  nM (although  $k_{on}$  and  $k_{off}$  differ for the two binding processes). As these two binding processes have similar affinities, we report the affinity as the average of  $K_{d1}$  and  $K_{d2}$ ,  $\sim 540$  nM.

F045-092 Fab vs A/Adachi/2/1957 (H2N2) HA,  $K_d = 1700$  nM

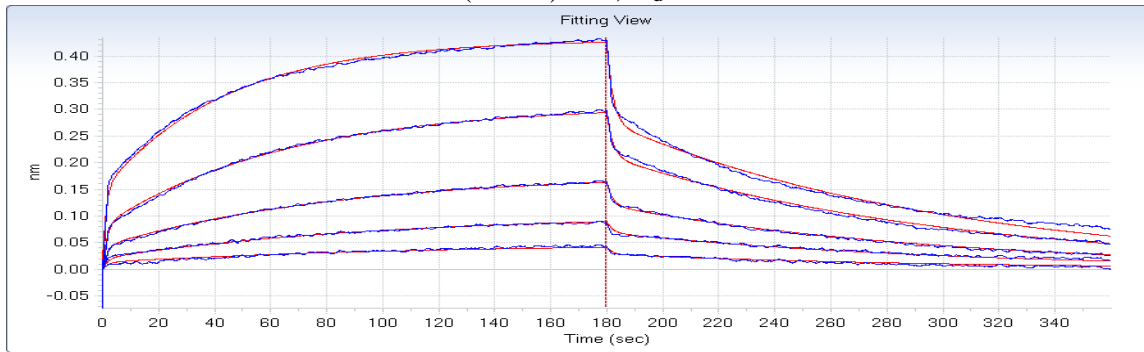

These data were fit with a 2:1 binding model, yielding apparent  $K_{d1} = 1200$  nM and  $K_{d2} = 2200$  nM (although  $k_{on}$  and  $k_{off}$  differ for the two binding processes). As these two binding processes have similar affinities, we report the affinity as the average of  $K_{d1}$  and  $K_{d2}$ ,  $\sim 1700$  nM.

F045-092 Fab vs A/duck/Ukraine/1/1963 (H3N8) HA,  $K_d = 1700$  nM

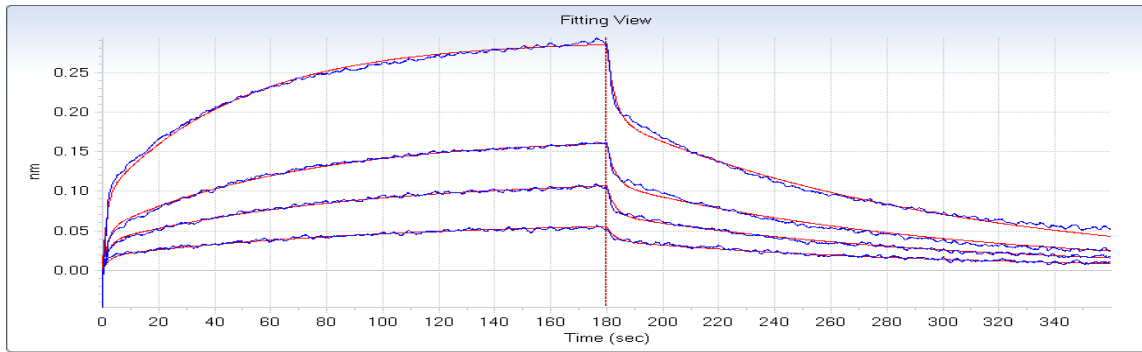

These data were fit with a 2:1 binding model, yielding apparent  $K_{d1} = 1300$  nM and  $K_{d2} = 2000$  nM (although  $k_{on}$  and  $k_{off}$  differ for the two binding processes). As these two binding processes have similar affinities, we report the affinity as the average of  $K_{d1}$  and  $K_{d2}$ ,  $\sim 1700$  nM.

F045-092 Fab vs A/Hong Kong/1/1968 (H3N2) HA,  $K_d = 31$  nM

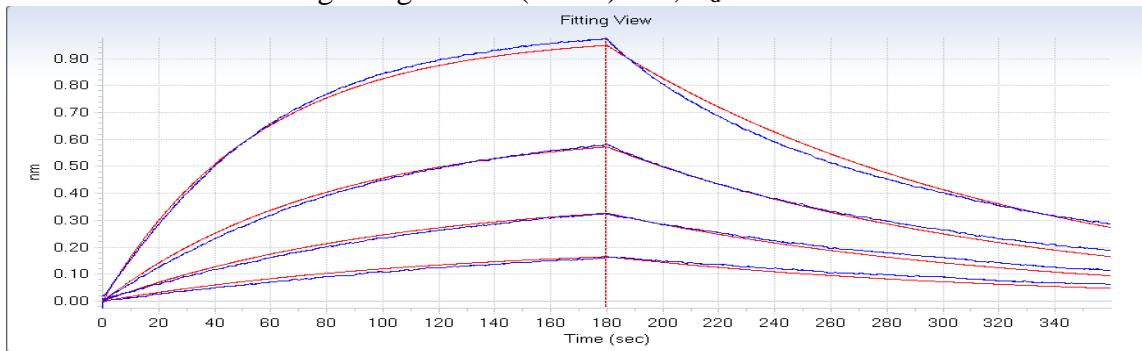

F045-092 Fab vs A/Victoria/3/1975 (H3N2) HA,  $K_d = 6.1$  nM

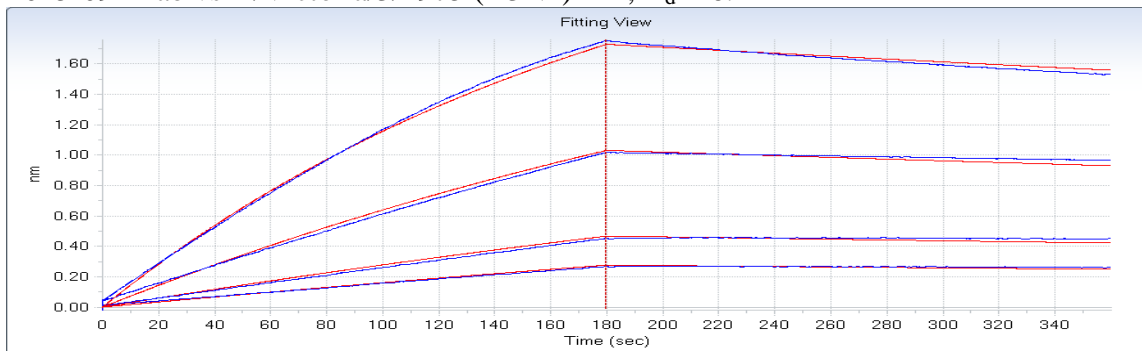

F045-092 Fab vs A/Bangkok/1/1979 (H3N2) HA,  $K_d = 140$  nM



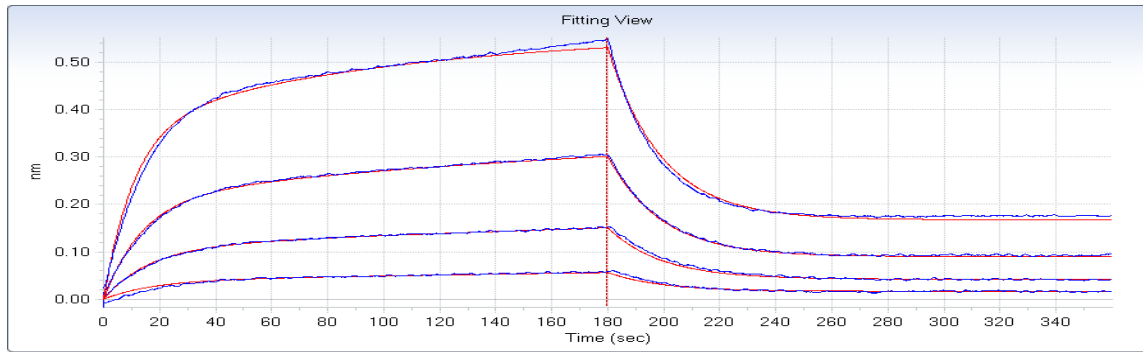

These data were fit with a 2:1 binding model, yielding apparent  $K_{d1} = 140$  nM and  $K_{d2} = 0.2$  nM. The dominant binding process (accounting for the majority of the shift in observed wavelength) corresponds to the lower affinity process ( $K_{d1} = 140$  nM) whereas the higher affinity process may reflect a non-specific interaction. The maximum Fab concentration tested in this experiment was 200 nM. Therefore, we report the affinity for this interaction as 140 nM.

F045-092 Fab vs A/Leningrad/360/1986 (H3N2) HA,  $K_d = 9.6$  nM

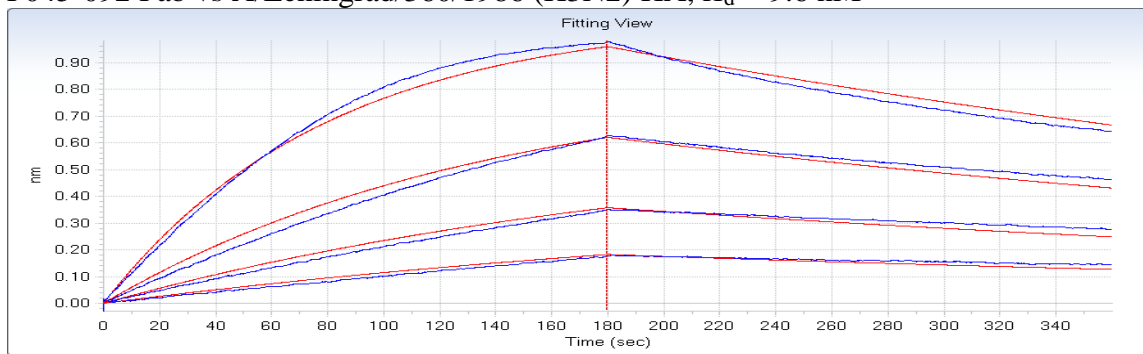

F045-092 Fab vs A/Beijing/353/1989 (H3N2) HA,  $K_d = 180$  nM

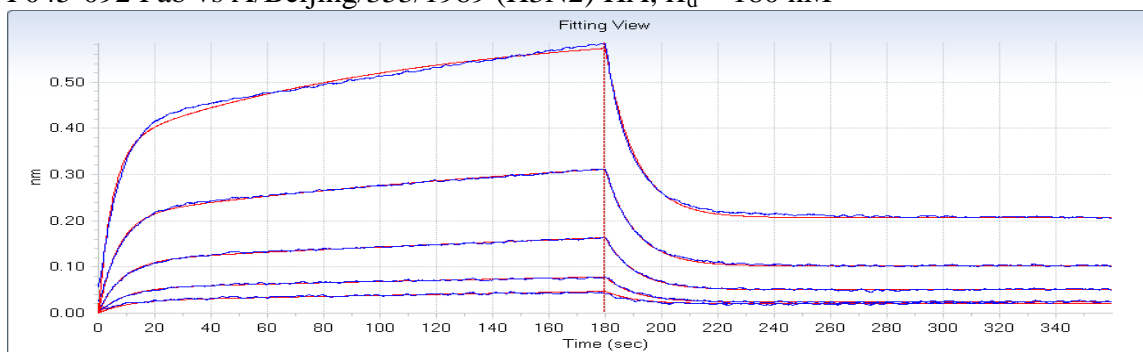

These data were fit with a 2:1 binding model, yielding apparent  $K_{d1} = 180$  nM,  $K_{d2} = 2$  pM. The dominant binding process (accounting for the majority of the shift in observed wavelength) corresponds to the lower affinity process ( $K_{d1} = 180$  nM) whereas the higher affinity process may reflect a non-specific interaction. The maximum Fab concentration tested in this experiment was 200 nM. Therefore, we report the affinity for this interaction as 180 nM.

F045-092 Fab vs A/Shangdong/9/1993 (H3N2) HA,  $K_d = 2.6$  nM

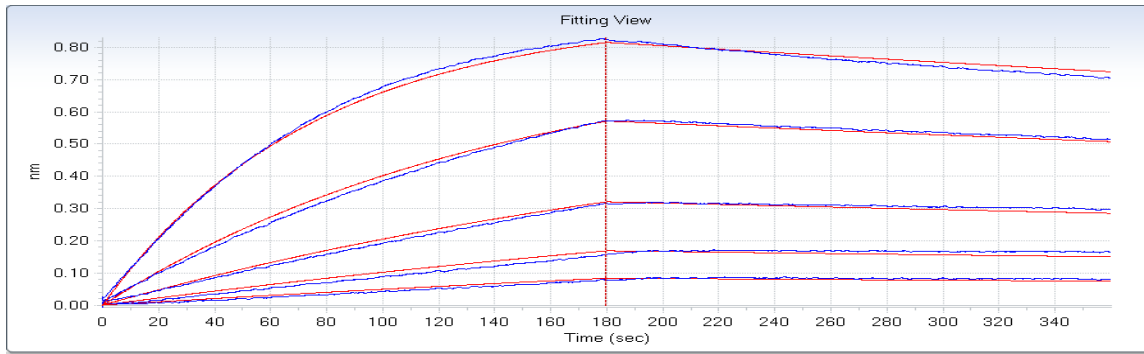

F045-092 Fab vs A/Panama/2007/1999 (H3N2) HA,  $K_d = 23$  nM

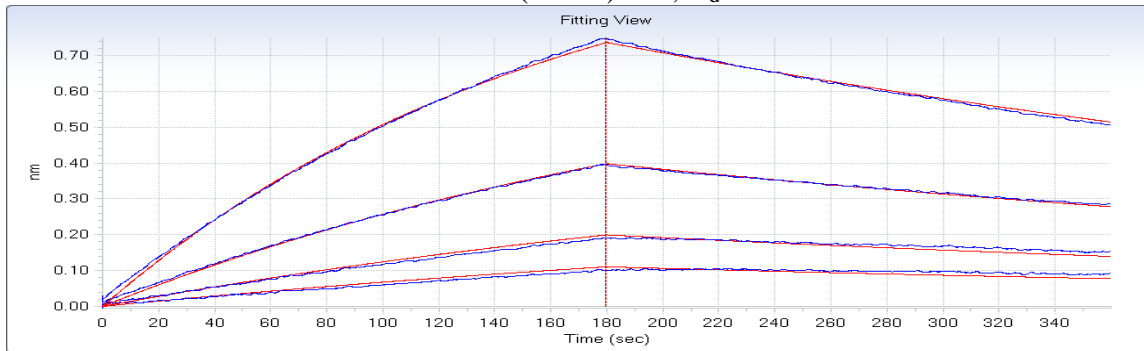

F045-092 Fab vs A/Moscow/10/1999 (H3N2) HA,  $K_d = 1.1$  nM

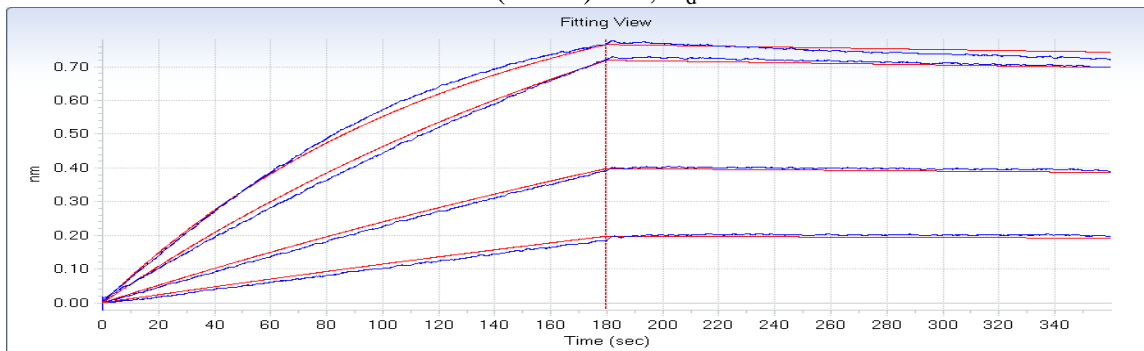

F045-092 Fab vs A/Wyoming/3/2003 (H3N2) HA,  $K_d = 630$  nM

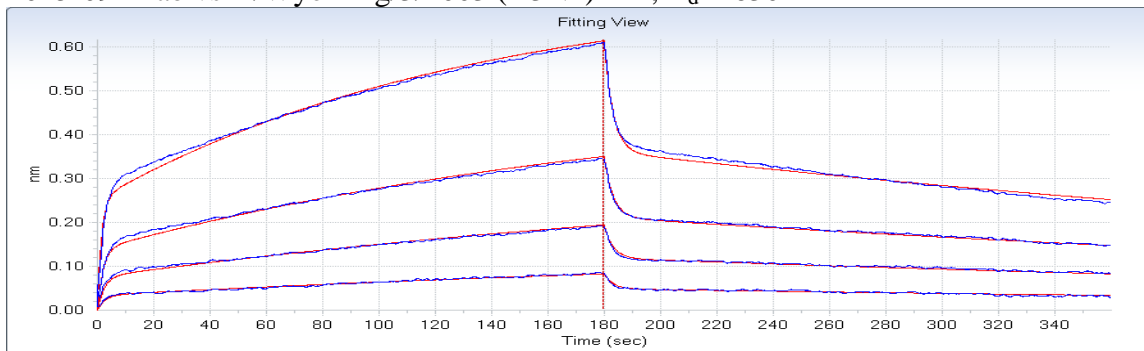

These data were fit with a 2:1 binding model, yielding apparent  $K_{d1} = 370$  nM and  $K_{d2} = 890$  nM (although  $k_{on}$  and  $k_{off}$  differ for the two binding processes). As these two binding processes have similar affinities, we report the affinity as the average of  $K_{d1}$  and  $K_{d2}$ , ~630 nM.

#### F045-092 Fab vs A/Brisbane/10/2007 (H3N2) HA, $K_d = 120$ nM

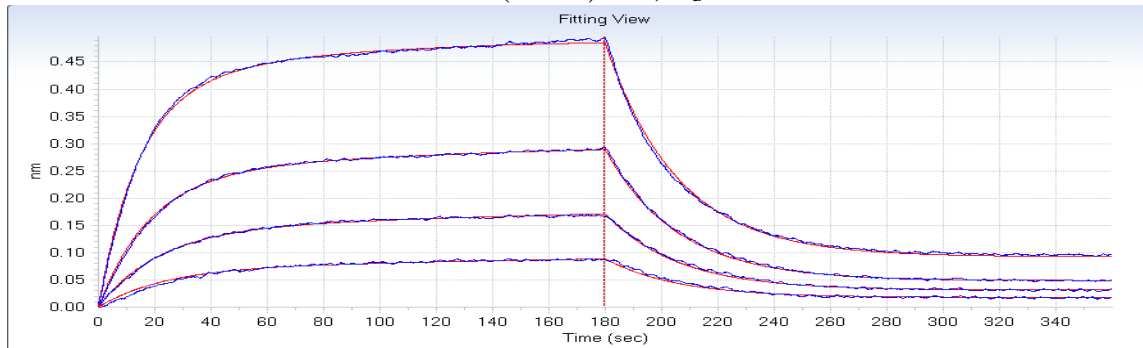

These data were fit with a 2:1 binding model, yielding apparent  $K_{d1} = 120$  nM,  $K_{d2} = 40$  pM. The dominant binding process (accounting for the majority of the shift in observed wavelength) corresponds to the lower affinity process ( $K_{d1} = 120$  nM) whereas the higher affinity process may reflect a non-specific interaction. The maximum Fab concentration tested in this experiment was 200 nM. Therefore, we report the affinity for this interaction as 120 nM.

#### F045-092 Fab vs A/Perth/16/2009 (H3N2) HA, $K_d = 150$ nM

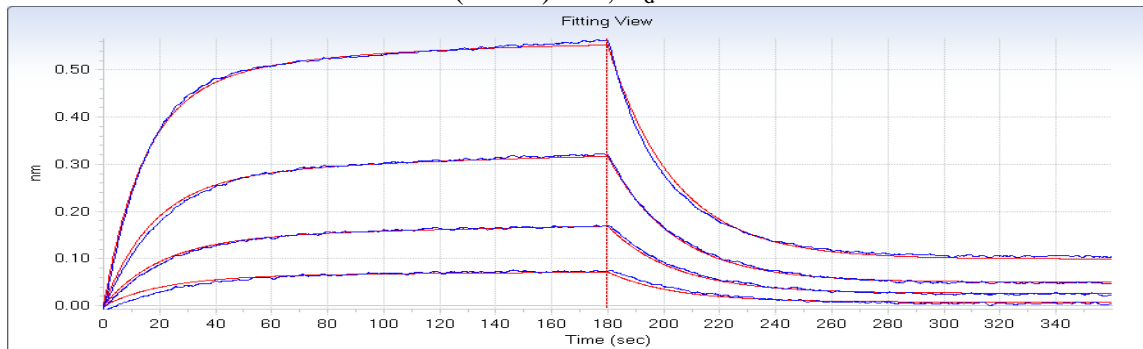

These data were fit with a 2:1 binding model, yielding apparent  $K_{d1} = 150$  nM,  $K_{d2} = 90$  pM. The dominant binding process (accounting for the majority of the shift in observed wavelength) corresponds to the lower affinity process ( $K_{d1} = 150$  nM) whereas the higher affinity process may reflect a non-specific interaction. The maximum Fab concentration tested in this experiment was 200 nM. Therefore, we report the affinity for this interaction as 150 nM.

#### F045-092 Fab vs A/Victoria/361/2011 (H3N2) HA, $K_d = 110$ nM

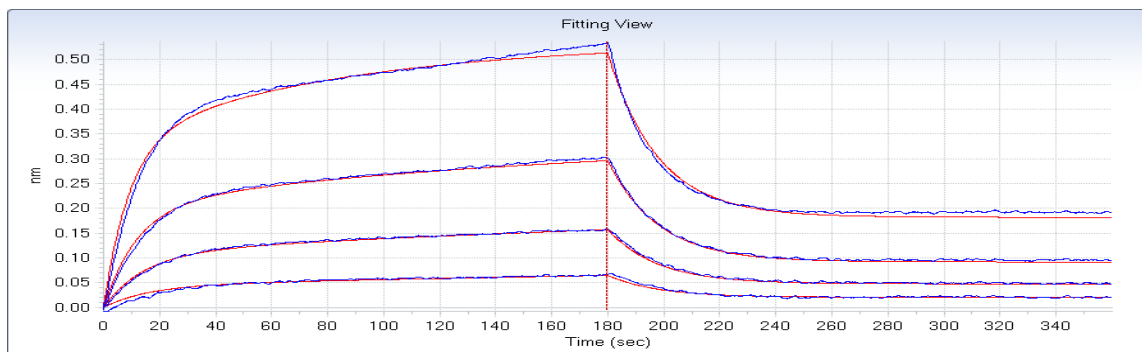

These data were fit with a 2:1 binding model, yielding apparent  $K_{d1} = 110$  nM,  $K_{d2} = 0.4$  nM. The dominant binding process (accounting for the majority of the shift in observed wavelength) corresponds to the lower affinity process ( $K_{d1} = 110$  nM) whereas the higher affinity process may reflect a non-specific interaction. The maximum Fab concentration tested in this experiment was 200 nM. Therefore, we report the affinity for this interaction as 110 nM.

#### F045-092 Fab vs A/gull/Maryland/704/1977 (H13N6) HA, $K_d = 870$ nM

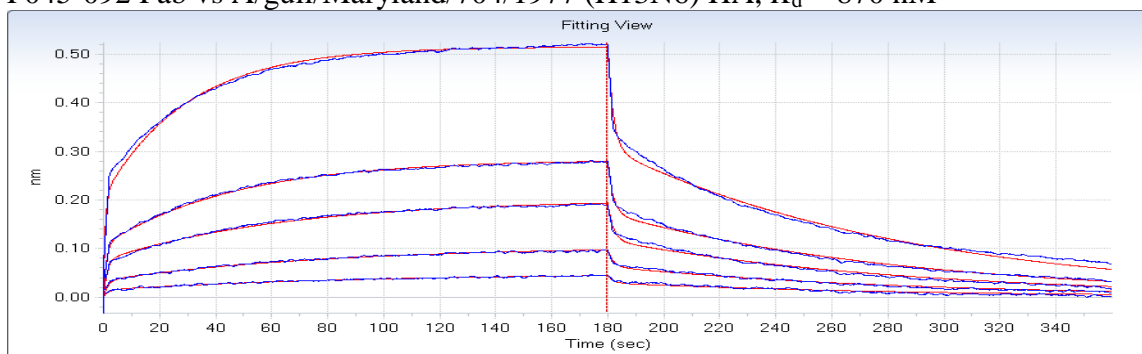

These data were fit with a 2:1 binding model, yielding apparent  $K_{d1} = 790$  nM and  $K_{d2} = 940$  nM (although  $k_{on}$  and  $k_{off}$  differ for the two binding processes). As these two binding processes have similar affinities, we report the affinity as the average of  $K_{d1}$  and  $K_{d2}$ , ~480 nM.

#### F045-092 IgG vs A/Beijing/262/1995 (H1N1) HA, $K_d = 40$ nM

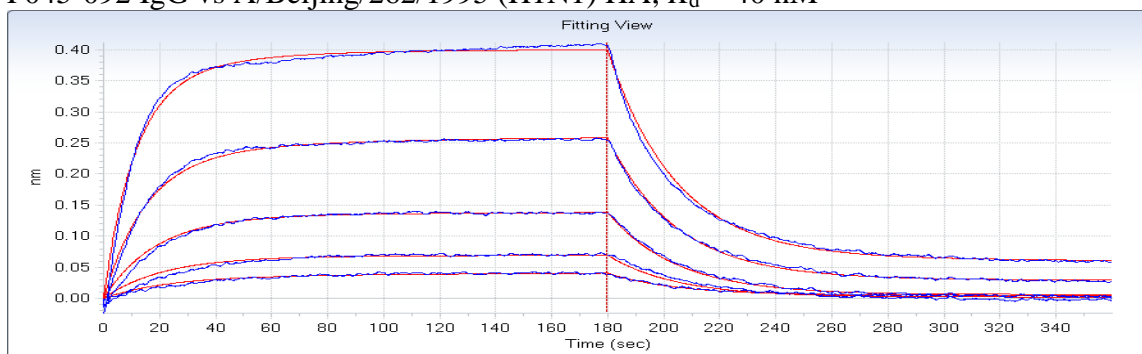

These data were fit with a 2:1 binding model, yielding apparent  $K_{d1} = 40$  nM,  $K_{d2} = 0.7$  nM. The dominant binding process (accounting for the majority of the shift in observed wavelength) corresponds to the lower affinity process ( $K_{d1} = 40$  nM) whereas the higher affinity process may reflect a non-specific interaction. The maximum Fab concentration tested in this experiment was 50 nM. Therefore, we report the affinity for this interaction as 40 nM.

F045-092 IgG vs A/New Caledonia/20/1999 (H1N1) HA,  $K_d = 10$  nM

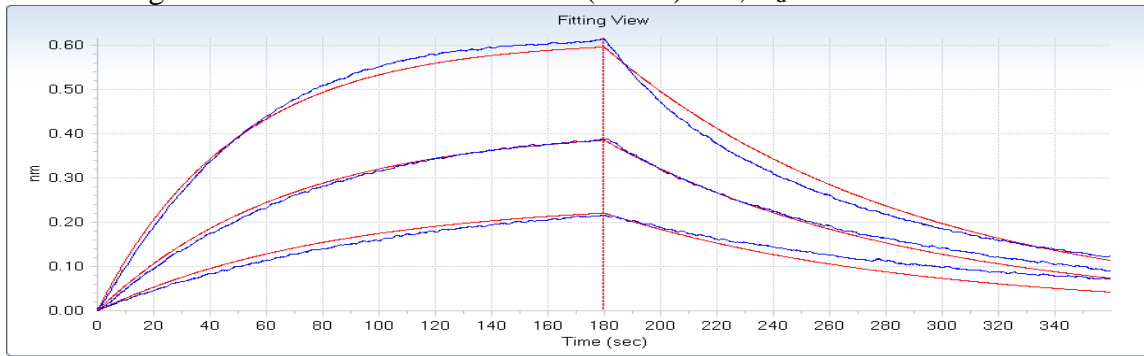

F045-092 IgG vs A/Adachi/2/1957 (H2N2) HA,  $K_d = 18$  nM

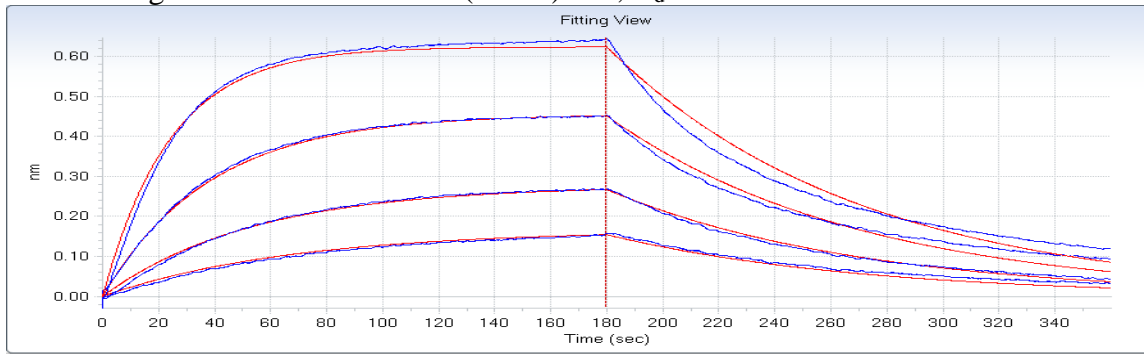

F045-092 IgG vs A/duck/Ukraine/1/1963 (H3N8) HA,  $K_d = 31$  nM

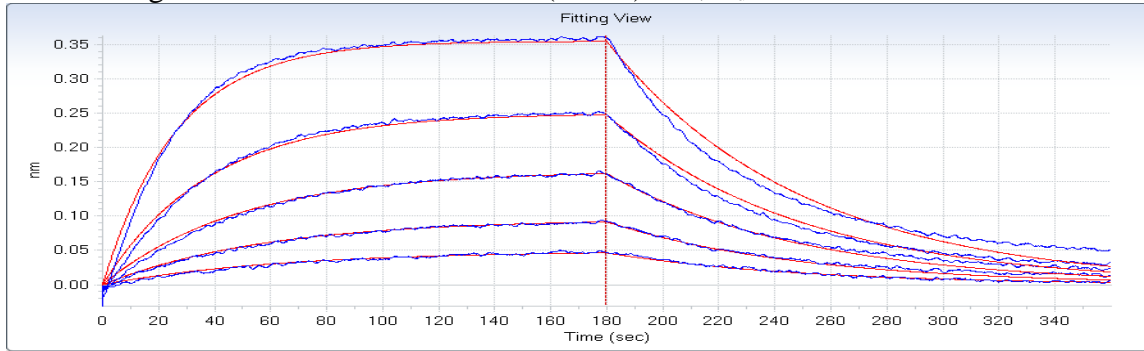

F045-092 IgG vs A/Hong Kong/1/1968 (H3N2) HA,  $K_d < 10$  pM

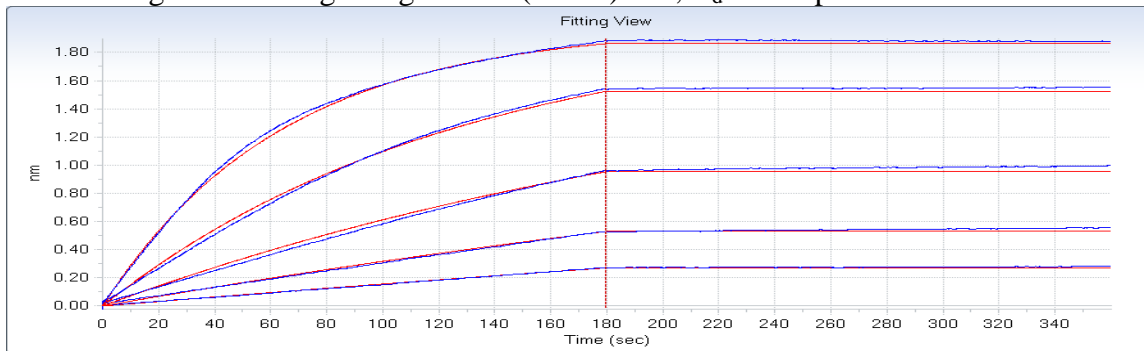

These data were fit with a 1:1 binding model, yielding apparent  $K_d = 2.2$  fM, which is beyond the specified detection limit of 10 pM. Therefore, we report the affinity for this interaction is stronger than 10 pM.

F045-092 IgG vs A/Victoria/3/1975 (H3N2) HA,  $K_d = <10$  pM

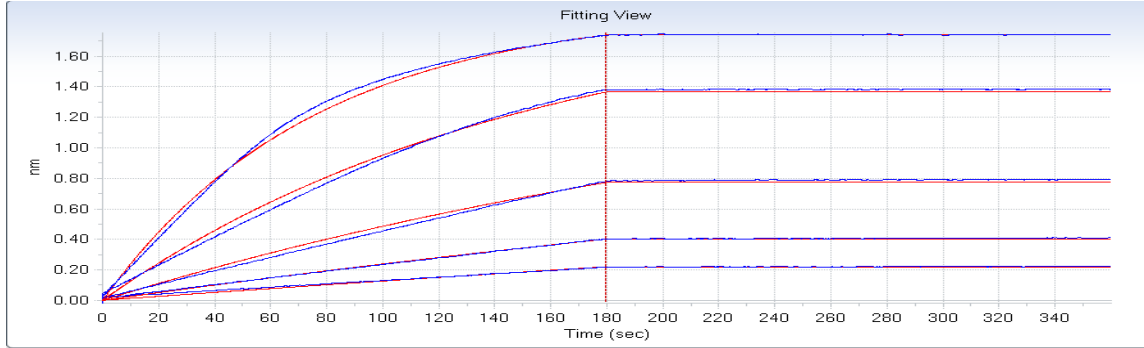

These data were fit with a 1:1 binding model, yielding apparent  $K_d = 2.6$  fM, which is beyond the specified detection limit of 10 pM. Therefore, we report the affinity for this interaction is stronger than 10 pM.

F045-092 IgG vs A/Bangkok/1/1979 (H3N2) HA,  $K_d = 0.2$  nM

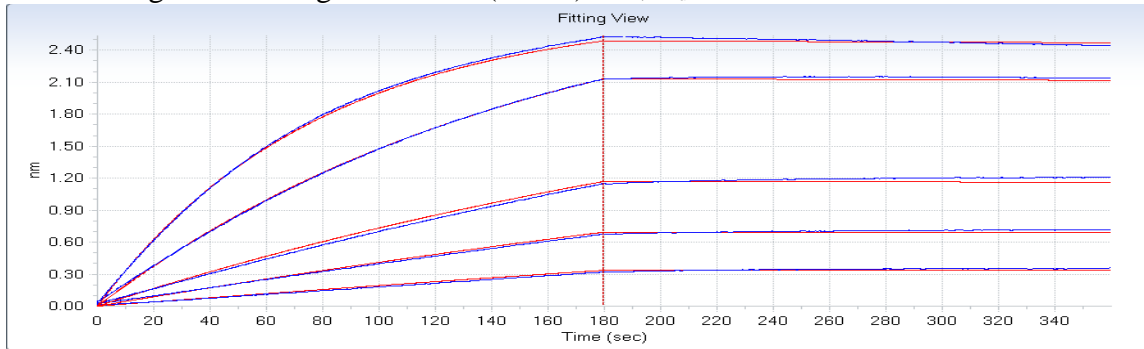

F045-092 IgG vs A/Leningrad/360/1986 (H3N2) HA,  $K_d = 32$  pM

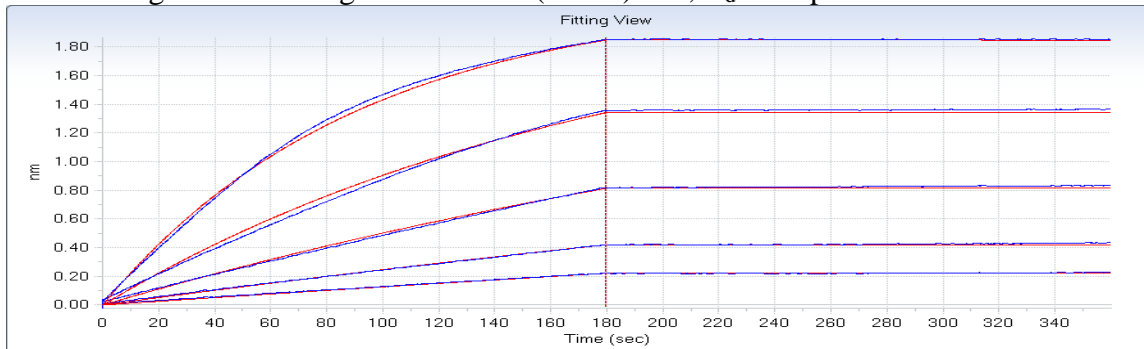

F045-092 IgG vs A/Beijing/353/1989 (H3N2) HA,  $K_d = 2.2$  nM

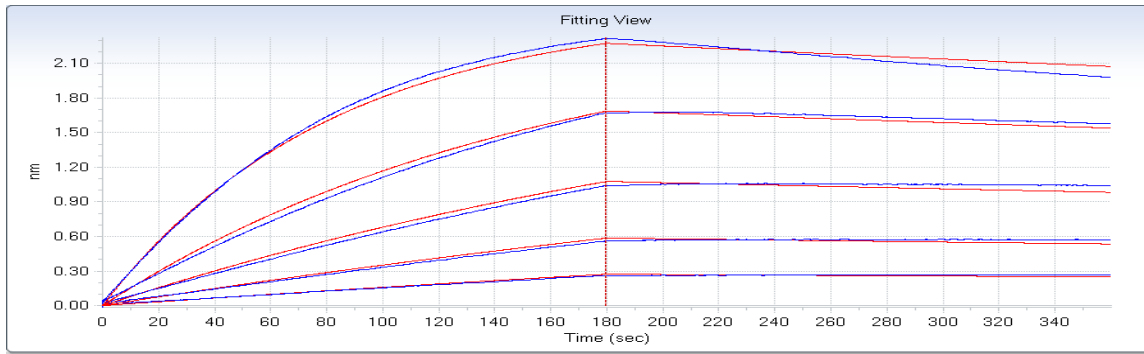

F045-092 IgG vs A/Shangdong/9/1993 (H3N2) HA,  $K_d = <10$  pM

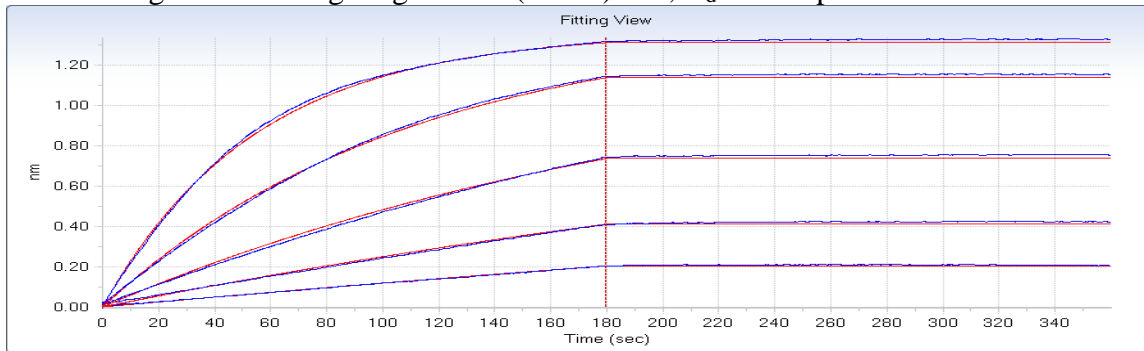

These data were fit with a 1:1 binding model, yielding apparent  $K_d = 1.9$  fM, which is beyond the specified detection limit of 10 pM. Therefore, we report the affinity for this interaction is stronger than 10 pM.

F045-092 IgG vs A/Panama/2007/1999 (H3N2) HA,  $K_d = <10$  pM

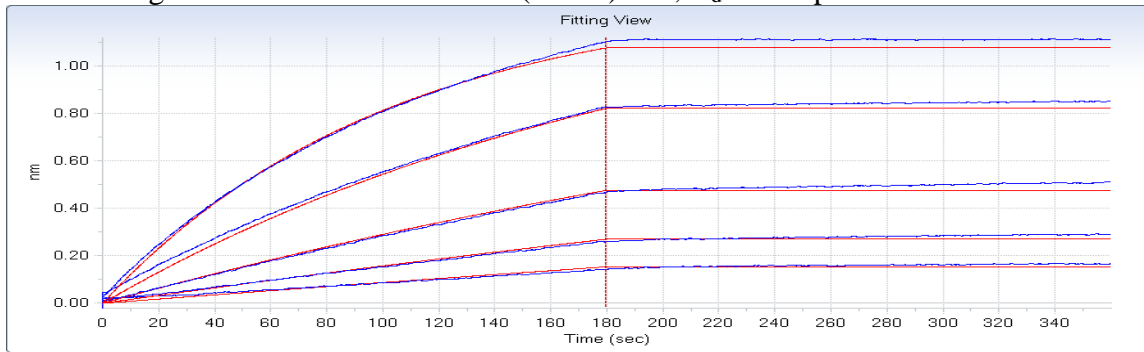

These data were fit with a 1:1 binding model, yielding apparent  $K_d = 14$  fM, which is beyond the specified detection limit of 10 pM. Therefore, we report the affinity for this interaction is stronger than 10 pM.

F045-092 IgG vs A/Moscow/10/1999 (H3N2) HA,  $K_d = 23$  pM



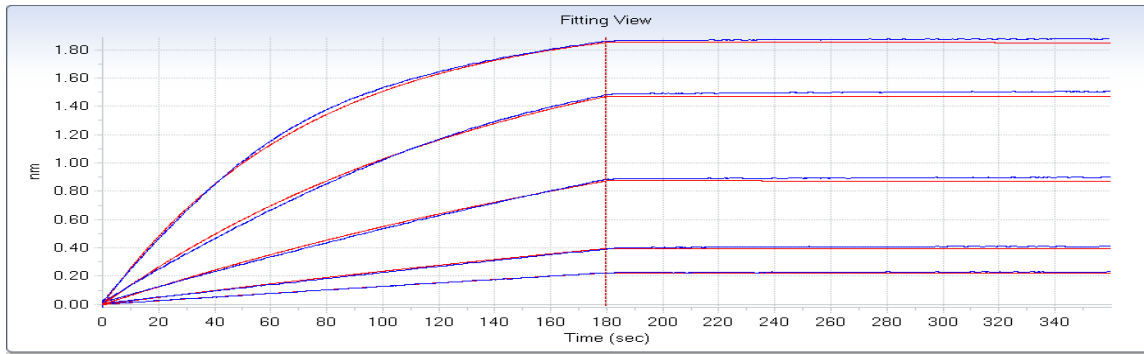

F045-092 IgG vs A/Wyoming/3/2003 (H3N2) HA,  $K_d = 10$  nM

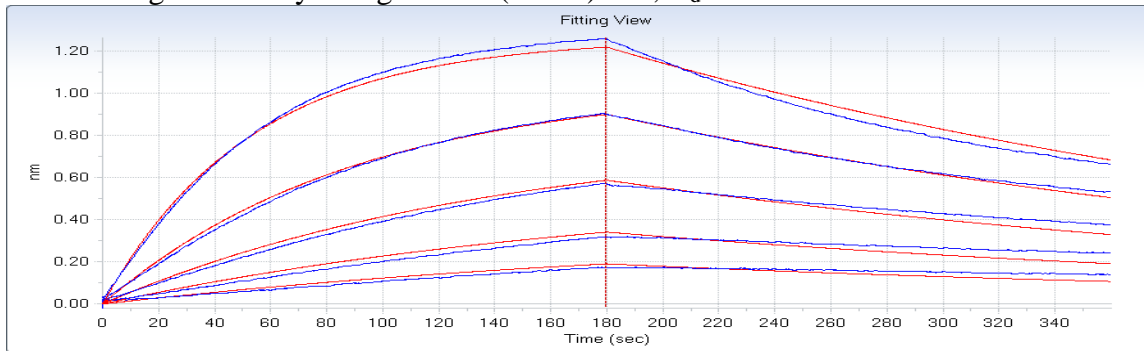

F045-092 IgG vs A/Brisbane/10/2007 (H3N2) HA,  $K_d = 0.6$  nM

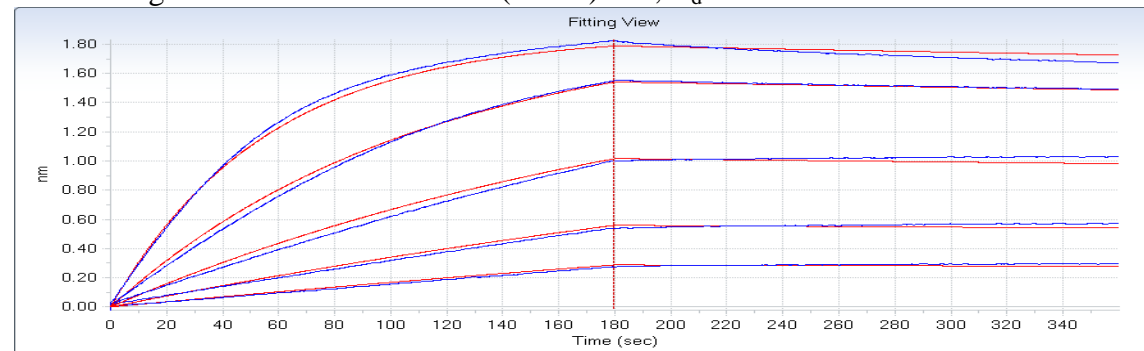

F045-092 IgG vs A/Perth/16/2009 (H3N2) HA,  $K_d = 0.5$  nM

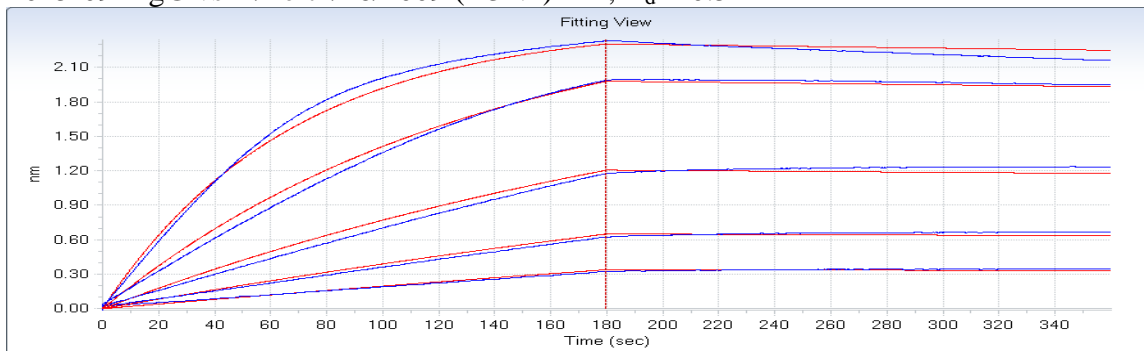

F045-092 IgG vs A/Victoria/361/2011 (H3N2) HA,  $K_d = 0.8$  nM

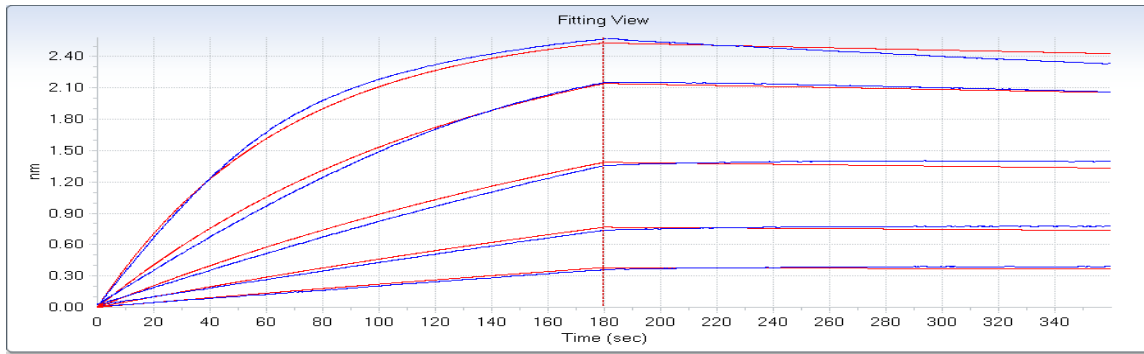

F045-092 IgG vs A/gull/Maryland/704/1977 (H13N6) HA,  $K_d = 14$  nM

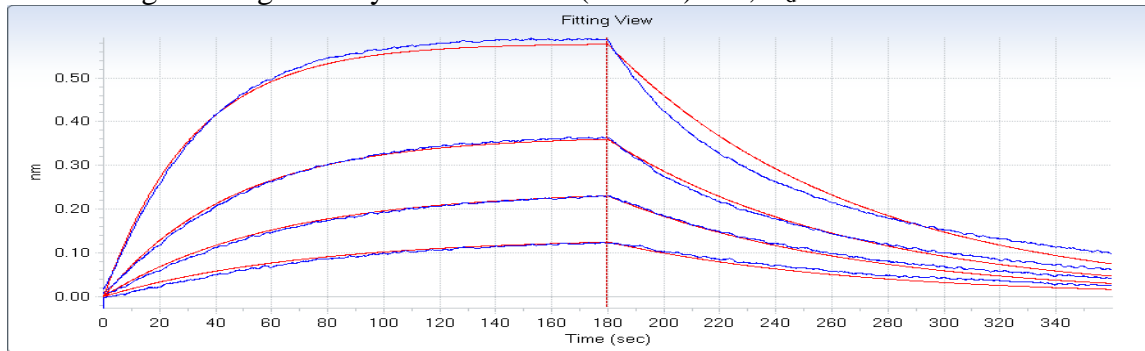

F045-092 Fab His<sup>H100a</sup>Ala vs A/Hong Kong/1/1968 (H3N2) HA,  $K_d = 390$  nM

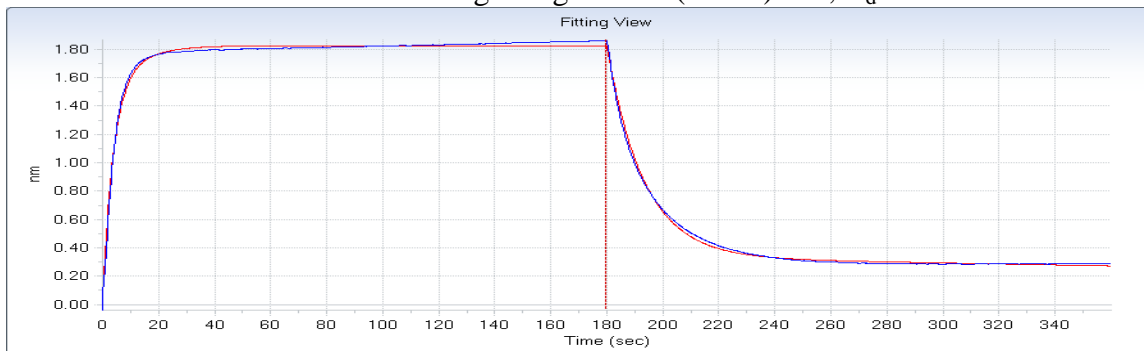

These data were fit with a 2:1 binding model, yielding apparent  $K_{d1} = 390$  nM,  $K_{d2} = 13$  nM. The dominant binding process (accounting for the majority of the shift in observed wavelength) corresponds to the lower affinity process ( $K_{d1} = 390$  nM) whereas the higher affinity process may reflect a non-specific interaction. The Fab concentration tested in this experiment was 1000 nM. Therefore, we report the affinity for this interaction as  $\sim 390$  nM.

F045-092 Fab His<sup>H100a</sup>Ala vs A/Victoria/3/1975 (H3N2) HA,  $K_d = 8.9$  nM

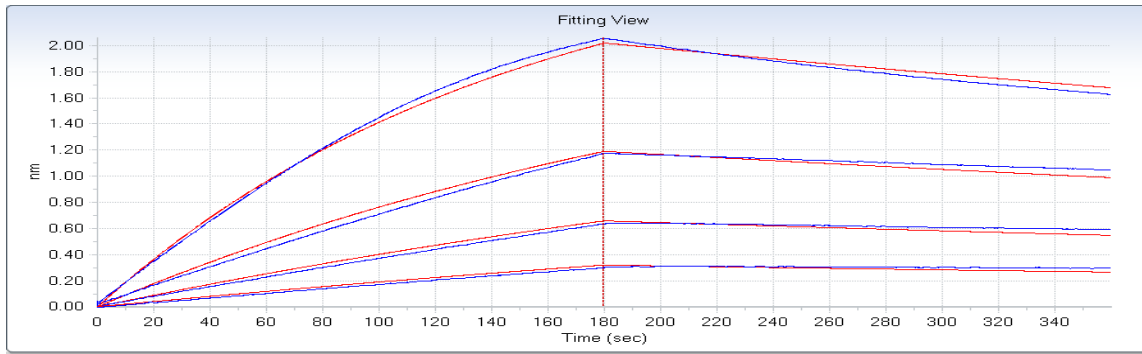

F045-092 Fab His<sup>H100a</sup> Ala vs A/Bangkok/1/1979 (H3N2) HA,  $K_d = 480$  nM

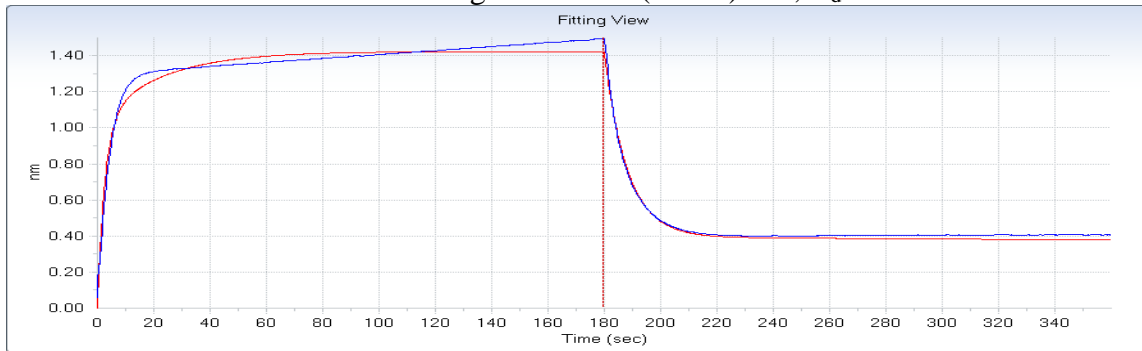

These data were fit with a 2:1 binding model, yielding apparent  $K_{d1} = 480$  nM,  $K_{d2} = 5.4$  nM. The dominant binding process (accounting for the majority of the shift in observed wavelength) corresponds to the lower affinity process ( $K_{d1} = 480$  nM) whereas the higher affinity process may reflect a non-specific interaction. The Fab concentration tested in this experiment was 1000 nM. Therefore, we report the affinity for this interaction as  $\sim 480$  nM.

F045-092 Fab His<sup>H100a</sup> Ala vs A/Leningrad/360/1986 (H3N2) HA,  $K_d = 20$  nM

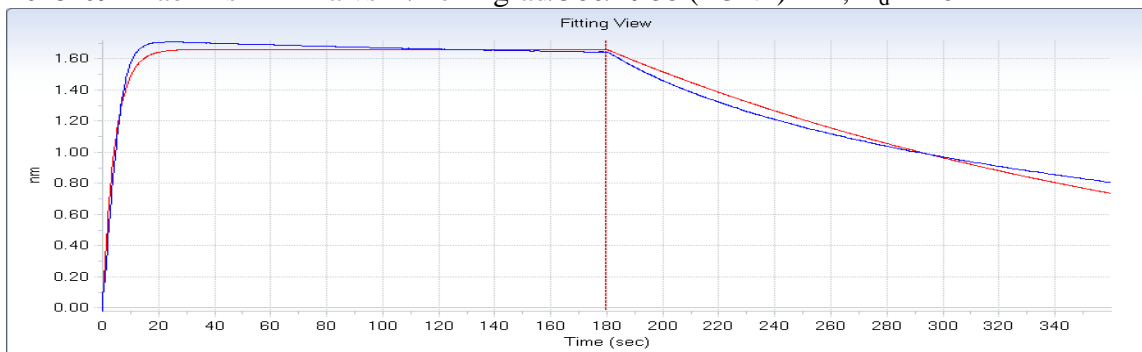

F045-092 Fab His<sup>H100a</sup> Ala vs A/Beijing/353/1989 (H3N2) HA,  $K_d = 1000$  nM

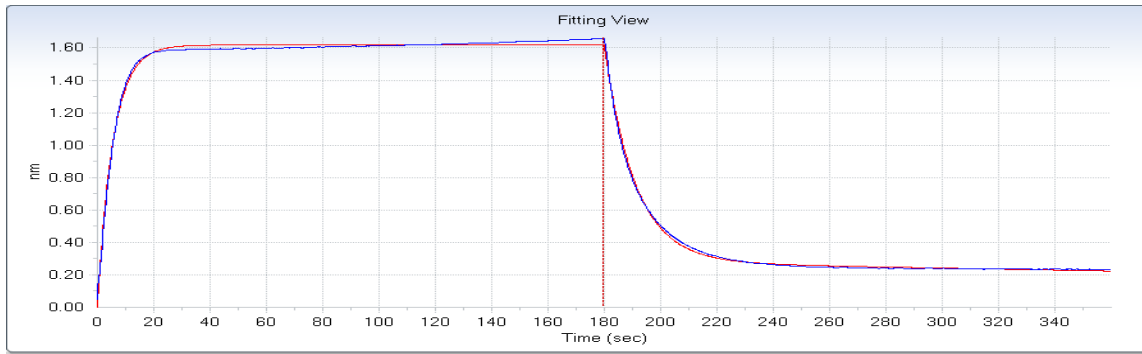

These data were fit with a 2:1 binding model, yielding apparent  $K_{d1} = 1000$  nM,  $K_{d2} = 7.5$  nM. The dominant binding process (accounting for the majority of the shift in observed wavelength) corresponds to the lower affinity process ( $K_{d1} = 1000$  nM) whereas the higher affinity process may reflect a non-specific interaction. The Fab concentration tested in this experiment was 1000 nM. Therefore, we report the affinity for this interaction as  $\sim 1000$  nM.

F045-092 Fab His<sup>H100a</sup> Ala vs A/Shangdong/9/1993 (H3N2) HA,  $K_d = 12$  nM

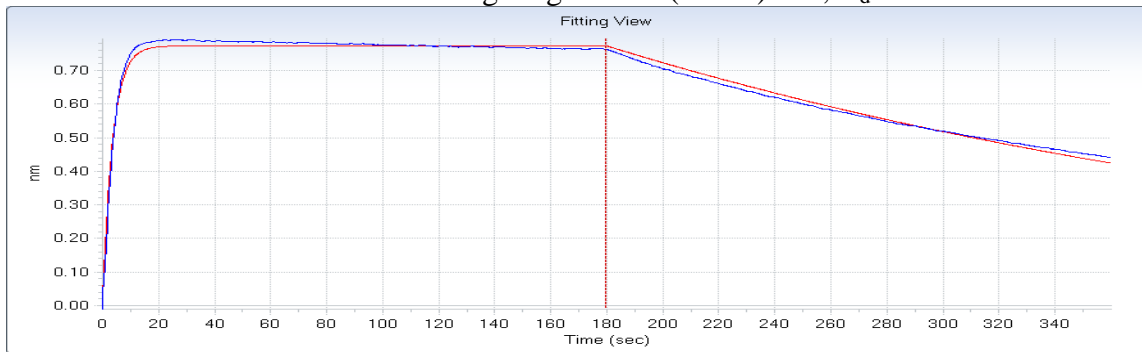

F045-092 Fab His<sup>H100a</sup> Ala vs A/Panama/2007/1999 (H3N2) HA,  $K_d = 200$  nM

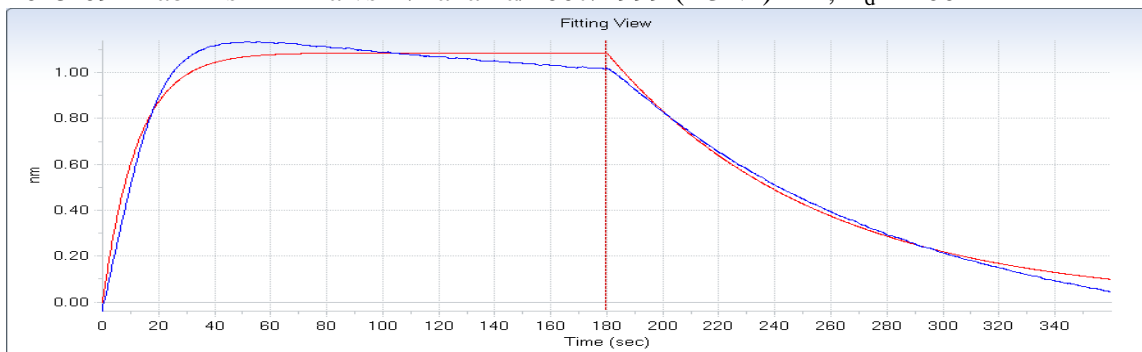

F045-092 Fab His<sup>H100a</sup> Ala vs A/Moscow/10/1999 (H3N2) HA,  $K_d = 3.3$  nM

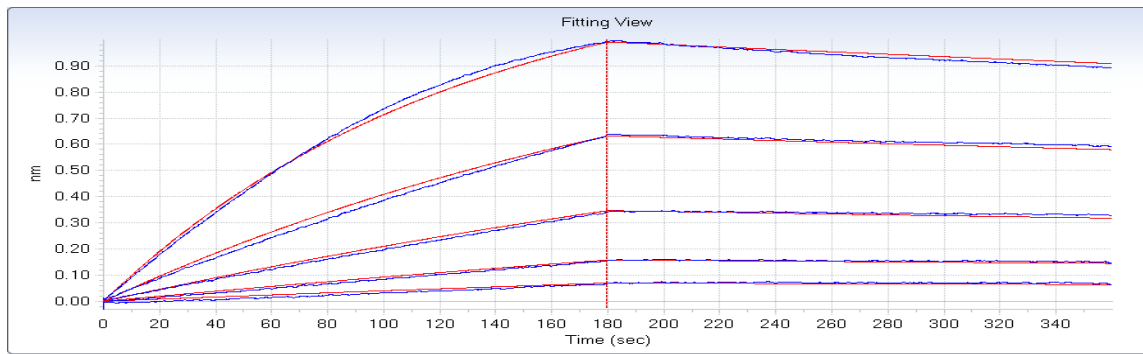

F045-092 Fab His<sup>H100a</sup> Ala vs A/Wyoming/3/2003 (H3N2) HA,  $K_d = 6600$  nM

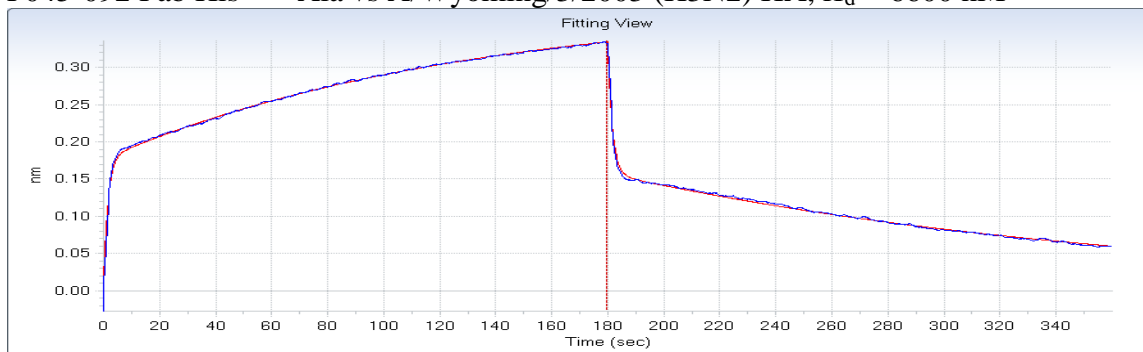

These data were fit with a 2:1 binding model, yielding apparent  $K_{d1} = 11000$  nM and  $K_{d2} = 2200$  nM (although  $k_{on}$  and  $k_{off}$  differ for the two binding processes). As these two binding processes have similar affinities, we report the affinity as the average of  $K_{d1}$  and  $K_{d2}$ ,  $\sim 6600$  nM.

F045-092 Fab His<sup>H100a</sup> Ala vs A/Brisbane/10/2007 (H3N2) HA,  $K_d = 440$  nM

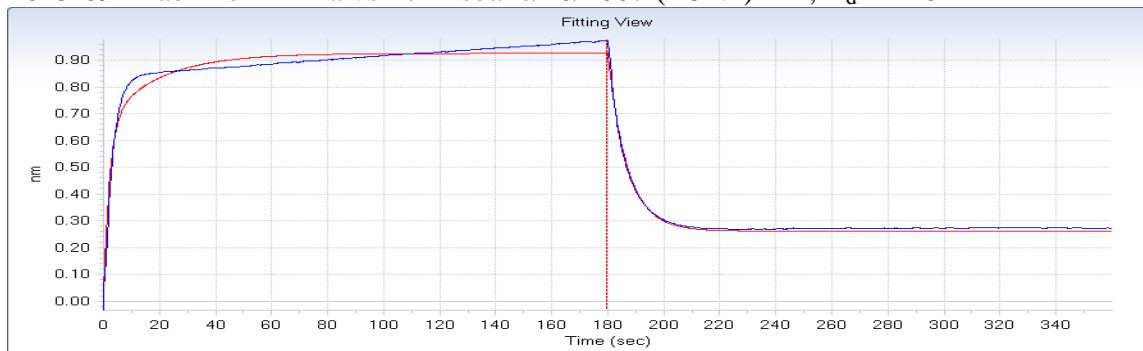

These data were fit with a 2:1 binding model, yielding apparent  $K_{d1} = 440$  nM,  $K_{d2} = 1.2$  nM. The dominant binding process (accounting for the majority of the shift in observed wavelength) corresponds to the lower affinity process ( $K_{d1} = 440$  nM) whereas the higher affinity process may reflect a non-specific interaction. The Fab concentration tested in this experiment was 1000 nM. Therefore, we report the affinity for this interaction as  $\sim 440$  nM.

F045-092 Fab His<sup>H100a</sup> Ala vs A/Perth/16/2009 (H3N2) HA,  $K_d = 450$  nM

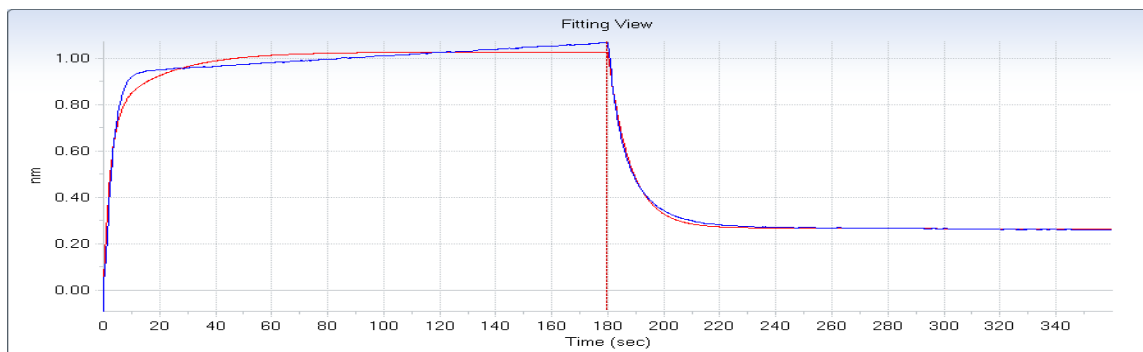

These data were fit with a 2:1 binding model, yielding apparent  $K_{d1} = 450$  nM,  $K_{d2} = 2.8$  nM. The dominant binding process (accounting for the majority of the shift in observed wavelength) corresponds to the lower affinity process ( $K_{d1} = 450$  nM) whereas the higher affinity process may reflect a non-specific interaction. The Fab concentration tested in this experiment was 1000 nM. Therefore, we report the affinity for this interaction as  $\sim 450$  nM.

F045-092 Fab His<sup>H100a</sup>Ala vs A/Victoria/361/2011 (H3N2) HA,  $K_d = 590$  nM

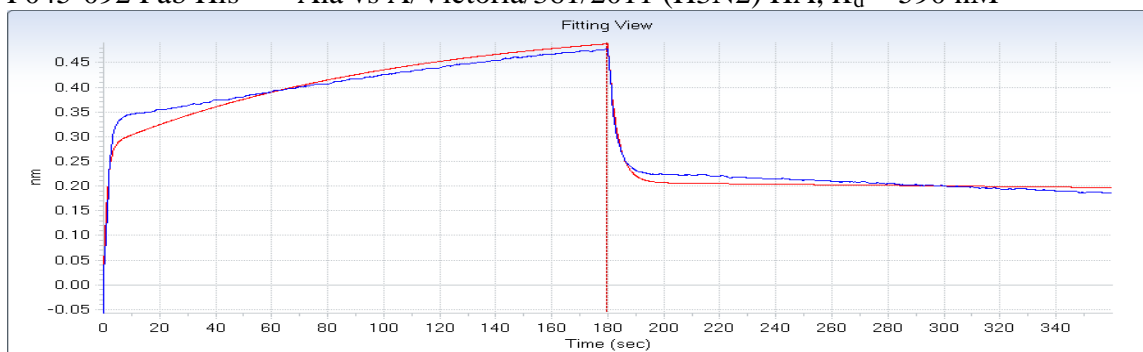

These data were fit with a 2:1 binding model, yielding apparent  $K_{d1} = 590$  nM,  $K_{d2} = 32$  nM. The dominant binding process (accounting for the majority of the shift in observed wavelength) corresponds to the lower affinity process ( $K_{d1} = 590$  nM) whereas the higher affinity process may reflect a non-specific interaction. The Fab concentration tested in this experiment was 1000 nM. Therefore, we report the affinity for this interaction as  $\sim 590$  nM.

F045-092 Fab Leu<sup>H100d</sup>Ala vs A/Victoria/3/1975 (H3N2) HA,  $K_d = 960$  nM

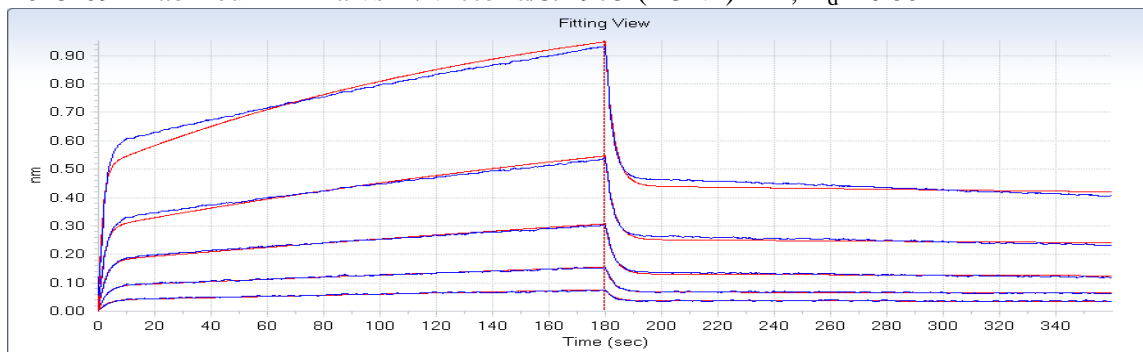

These data were fit with a 2:1 binding model, yielding apparent  $K_{d1} = 960$  nM,  $K_{d2} = 47$  nM. The dominant binding process (accounting for the majority of the shift in observed wavelength) corresponds to the lower affinity process ( $K_{d1} = 960$  nM) whereas the higher affinity process may

reflect a non-specific interaction. The maximum Fab concentration tested in this experiment was 1000 nM. Therefore, we report the affinity for this interaction as 960 nM.

F045-092 Fab Cys<sup>H100c</sup>Ala, Cys<sup>H100f</sup>Ala vs A/Victoria/3/1975 (H3N2) HA,  $K_d = 810$  nM

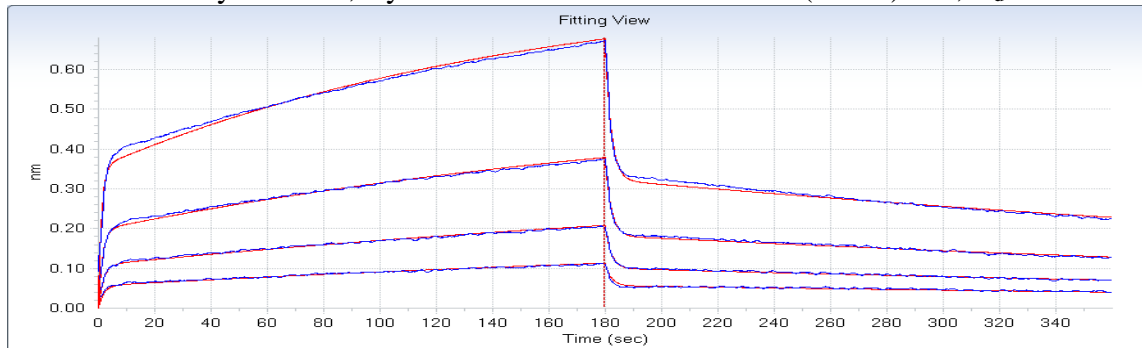

These data were fit with a 2:1 binding model, yielding apparent  $K_{d1} = 420$  nM and  $K_{d2} = 1200$  nM (although  $k_{on}$  and  $k_{off}$  differ for the two binding processes). As these two binding processes have similar affinities, we report the affinity as the average of  $K_{d1}$  and  $K_{d2}$ ,  $\sim 810$  nM.

F045-092 Fab Leu<sup>H100d</sup>Ala vs A/Moscow/10/1999 (H3N2) HA,  $K_d = 300$  nM

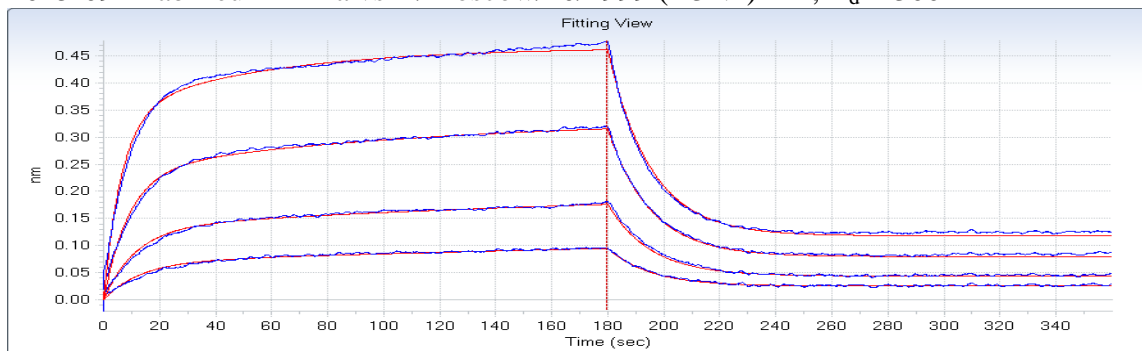

These data were fit with a 2:1 binding model, yielding apparent  $K_{d1} = 300$  nM,  $K_{d2} = 0.4$  nM. The dominant binding process (accounting for the majority of the shift in observed wavelength) corresponds to the lower affinity process ( $K_{d1} = 300$  nM) whereas the higher affinity process may reflect a non-specific interaction. The maximum Fab concentration tested in this experiment was 800 nM. Therefore, we report the affinity for this interaction as 300 nM.

F045-092 Fab Asp<sup>H100e</sup>Ala vs A/Moscow/10/1999 (H3N2) HA,  $K_d = 92$  nM

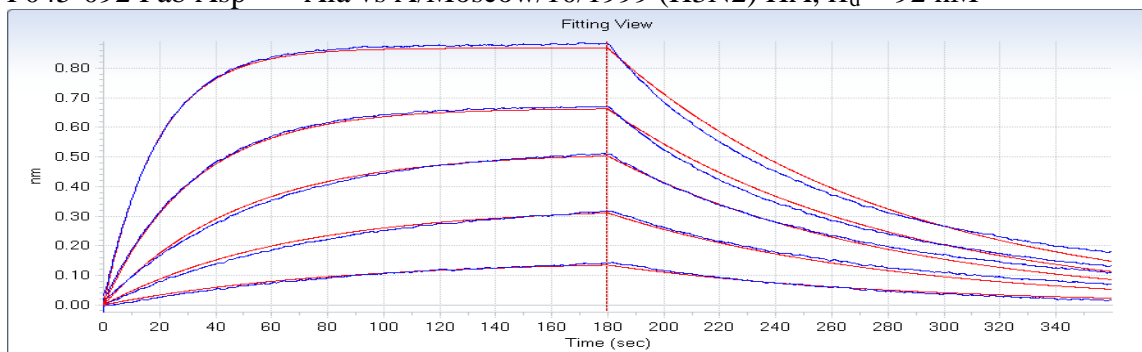

F045-092 Fab Cys<sup>H100c</sup>Ala, Cys<sup>H100f</sup>Ala vs A/Moscow/10/1999 (H3N2) HA,  $K_d = 410$  nM



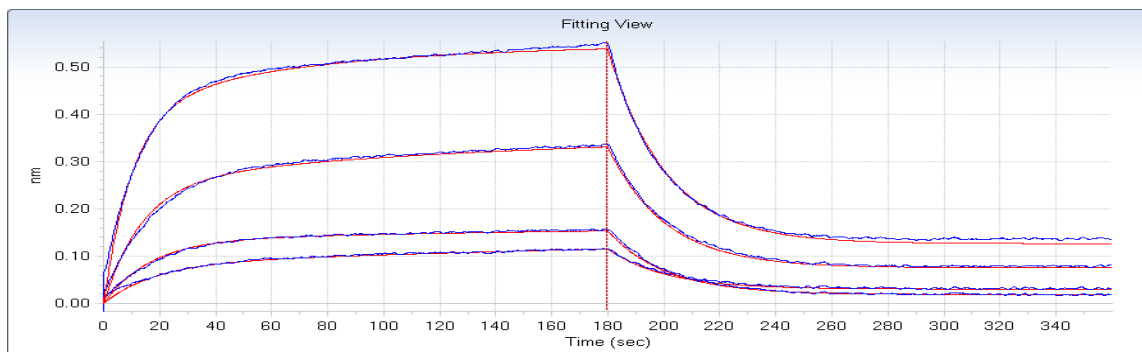

These data were fit with a 2:1 binding model, yielding apparent  $K_{d1} = 410$  nM,  $K_{d2} = 0.4$  nM. The dominant binding process (accounting for the majority of the shift in observed wavelength) corresponds to the lower affinity process ( $K_{d1} = 410$  nM) whereas the higher affinity process may reflect a non-specific interaction. The maximum Fab concentration tested in this experiment was 800 nM. Therefore, we report the affinity for this interaction as 410 nM.

**Supplementary Figure 7 | Binding curves for reported  $K_d$  values for F045-092 Fab, IgG, and Fab mutants with various HA isolates.** Blue curves are the experimental traces obtained from bio-layer interferometry experiments and the red curves are the best global fits to the data used to calculate the  $K_d$  values. Single point binding curves were measured using 1000 nM F045-092 Fab His<sup>100a</sup>Ala unless otherwise shown.

**Supplementary Table 1 | HA strains not bound by F045-092 Fab or IgG.**

| Subtype | Strain                                              | Binding      |              | Neutralization* |
|---------|-----------------------------------------------------|--------------|--------------|-----------------|
|         |                                                     | F045-092 Fab | F045-092 IgG | F045-092 IgG    |
| H1N1    | A/South Carolina/1/1918                             | –            | –            | NT              |
| H1N1    | A/WSN/1933                                          | –            | –            | NT              |
| H1N1    | A/Puerto Rico/8/1934                                | –            | –            | NT              |
| H1N1    | A/AA/Marton/1943                                    | –            | –            | NT              |
| H1N1    | A/duck/Alberta/345/1976                             | –            | –            | NT              |
| H1N1    | A/USSR/90/1977                                      | –            | –            | NT              |
| H1N1    | A/swine/Hokkaido/2/1981                             | NT           | NT           | –               |
| H1N1    | A/Singapore/6/1986                                  | –            | –            | NT              |
| H1N1    | A/Texas/36/1991                                     | –            | –            | NT              |
| H1N1    | A/Solomon Islands/3/2006                            | –            | ±            | NT              |
| H1N1    | A/California/04/2009                                | –            | –            | NT              |
| H1N1    | A/Suita/1/2009 pdm                                  | NT           | NT           | –               |
| H2N2    | A/Japan/305/1957                                    | –            | –            | NT              |
| H2N2    | A/duck/Hong Kong/273/1978                           | NT           | NT           | ±               |
| H4N6    | A/duck/Czechoslovakia/1956                          | –            | –            | NT              |
| H5N1    | A/duck/Mongolia/54/2001-<br>A/duck/Mongolia/47/2001 | NT           | NT           | ±               |
| H5N1    | A/Indonesia/05/2005                                 | –            | ±            | NT              |
| H6N2    | A/turkey/Massachusetts/3740/1965                    | –            | ±            | NT              |
| H7N7    | A/Netherlands/219/2003                              | –            | –            | NT              |
| H9N2    | A/turkey/Wisconsin/1/1966                           | –            | –            | NT              |
| H10N7   | A/chicken/Germany/N/1949                            | –            | –            | NT              |
| H11N6   | A/duck/England/1956                                 | –            | –            | NT              |
| H12N5   | A/duck/Alberta/60/1976                              | –            | –            | NT              |
| H14N5   | A/mallard duck/Astrakhan/263/1982                   | –            | –            | NT              |
| H15N8   | A/shearwater/Western<br>Australia/2576/1979         | –            | ±            | NT              |
| H16N3   | A/black-headed gull/Sweden/4/1999                   | –            | ±            | NT              |

\*Virus neutralizing activities adapted from Ohshima *et al.*<sup>1</sup>

NT, not tested

– no detectable binding or no neutralization activity

±  $K_d \geq 5000$  nM or  $IC_{50} > 200$  µg/mL

**Supplementary Table 2 | Buried molecular surface area of Fab-HA complexes.**

| Antibody    | PDB code | Epitope | Buried Surface Area ( $\text{\AA}^2$ ) |     |
|-------------|----------|---------|----------------------------------------|-----|
|             |          |         | HA                                     | Fab |
| F045-092    | 4O58     | RBS     | 490                                    | 480 |
| CR8043      | 4NM8     | Stem    | 510                                    | 550 |
| HC19        | 2VIR     | RBS     | 520                                    | 480 |
| F10         | 3FKU     | Stem    | 570                                    | 530 |
| C05         | 4FP8     | RBS     | 570                                    | 540 |
| CH67        | 4HKX     | RBS     | 610                                    | 590 |
| 2G1         | 4HG4     | RBS     | 610                                    | 580 |
| BH151       | 1EO8     | Head    | 630                                    | 590 |
| FI6V3 (H3)  | 3ZTJ     | Stem    | 630                                    | 590 |
| CR8020      | 3SDY     | Stem    | 640                                    | 640 |
| CR6261 (H5) | 3GBM     | Stem    | 650                                    | 590 |
| CH65        | 3SM5     | RBS     | 650                                    | 610 |
| 5J8         | 4M5Z     | RBS     | 660                                    | 640 |
| CR6261 (H1) | 3GBN     | Stem    | 670                                    | 600 |
| FI6V3 (H1)  | 3ZTN     | Stem    | 670                                    | 650 |
| CR9114      | 4FQI     | Stem    | 670                                    | 640 |
| HC63        | 1KEN     | RBS     | 680                                    | 740 |
| 8F8         | 4HF5     | RBS     | 720                                    | 690 |
| HC45        | 1QFU     | Head    | 730                                    | 710 |
| S139/1      | 4GMS     | RBS     | 730                                    | 720 |
| C179        | 4HLZ     | Stem    | 730                                    | 690 |
| 2D1         | 3LZF     | Head    | 740                                    | 760 |
| 1F1         | 4GXU     | RBS     | 770                                    | 760 |
| 8M2         | 4HFU     | RBS     | 770                                    | 760 |
| H5M9        | 4MHH     | Head    | 820                                    | 800 |

RBS, receptor-binding site.

Molecular protein surface areas buried upon Fab binding were calculated using MS<sup>2</sup> and sorted by increasing HA buried surface area. For crystal structures containing multiple symmetry-related copies, the average buried surface area of each copy is listed.

**Supplementary Table 3 | Sequence identity of residues in the F045-092 epitope of the Vic1975/H3 and Vic2011/H3 HAs.**

| HA residue | H3 consensus | Vic1975/H3 sequence | Vic2011/H3 sequence |
|------------|--------------|---------------------|---------------------|
| 131        | T<br>(76.2)  | T<br>(76.2)         | T<br>(76.2)         |
| 133        | N*<br>(87.6) | N<br>(87.6)         | N*<br>(87.6)        |
| 134        | G<br>(100.0) | G<br>(100.0)        | G<br>(100.0)        |
| 135        | T<br>(86.3)  | G<br>(7.7)          | T<br>(86.3)         |
| 136        | S<br>(100.0) | S<br>(100.0)        | S<br>(100.0)        |
| 137        | S<br>(82.9)  | S<br>(82.9)         | S<br>(82.9)         |
| 145        | N<br>(56.5)  | S<br>(16.4)         | N<br>(56.5)         |
| 153        | W<br>(99.9)  | W<br>(99.9)         | W<br>(99.9)         |
| 155        | T<br>(71.5)  | Y<br>(4.2)          | T<br>(71.5)         |
| 156        | H<br>(69.4)  | K<br>(11.7)         | H<br>(69.4)         |
| 157        | L<br>(87.8)  | S<br>(12.1)         | L<br>(87.8)         |
| 158        | K<br>(46.2)  | G<br>(2.9)          | N<br>(37.5)         |
| 193        | F<br>(55.9)  | N<br>(4.7)          | F<br>(55.9)         |
| 194        | L<br>(98.3)  | L<br>(98.3)         | L<br>(98.3)         |
| 226        | I<br>(65.0)  | L<br>(10.9)         | I<br>(65.0)         |

Number in parentheses indicates sequence identity of that residue at that position for human H3 isolates. An asterisk (\*) indicates a potential N-linked glycan at that position. Only the Vic1975/H3 contact residues are listed in the left column.

**Supplementary Table 4 | Binding breadth of wild type and mutants of F045-092 Fab with avian and human H3 isolates (1963-2011).**

| Subtype | Strain                | Wild type | H <sup>100a</sup> A | L <sup>100d</sup> A | D <sup>100e</sup> A | C <sup>100c</sup> A,<br>C <sup>100f</sup> A |
|---------|-----------------------|-----------|---------------------|---------------------|---------------------|---------------------------------------------|
| H3N8    | A/duck/Ukraine/1/1963 | +         | –                   | –                   | –                   | –                                           |
| H3N2    | A/Hong Kong/1/1968    | +++       | ++                  | ±                   | –                   | –                                           |
| H3N2    | A/Victoria/3/1975     | +++       | +++                 | +                   | –                   | +                                           |
| H3N2    | A/Bangkok/1/1979      | ++        | ++                  | –                   | –                   | –                                           |
| H3N2    | A/Leningrad/360/1986  | +++       | +++                 | ±                   | –                   | –                                           |
| H3N2    | A/Beijing/353/1989    | ++        | +                   | –                   | –                   | –                                           |
| H3N2    | A/Shangdong/9/1993    | ++++      | +++                 | ±                   | ±                   | ±                                           |
| H3N2    | A/Panama/2007/1999    | +++       | ++                  | –                   | –                   | –                                           |
| H3N2    | A/Moscow/10/1999      | ++++      | ++++                | ++                  | ++                  | ++                                          |
| H3N2    | A/Wyoming/3/2003      | +         | ±                   | –                   | –                   | –                                           |
| H3N2    | A/Brisbane/10/2007    | ++        | ++                  | –                   | –                   | –                                           |
| H3N2    | A/Perth/16/2009       | ++        | ++                  | –                   | –                   | –                                           |
| H3N2    | A/Victoria/361/2011   | ++        | +                   | –                   | –                   | –                                           |

Dissociation constants:

- no detectable binding
- ±  $K_d \geq 5,000$  nM
- +  $K_d = 500-5,000$  nM
- ++  $K_d = 50-500$  nM
- +++  $K_d = 5-50$  nM
- ++++  $K_d \leq 5$  nM

## Supplementary Methods

**Sequences of HA proteins used in binding studies.** The sequences listed below represent the full-length ORF as cloned in the baculovirus transfer vector. Most of the N-terminal signal peptide (MVLVNQSHQG FNKEHTSKMVSAIVLYVLLAAAAHSAFA) is presumably removed during secretion, leaving four non-native residues (ADPG) at the N-terminus of HA1. The C-terminal BirA biotinylation site, thrombin cleavage site, trimerization domain, and a His<sub>6</sub> tag are retained on all proteins.

### >A/South Carolina/1/1918 (H1N1)

```
MVLVNQSHQG FNKEHTSKMVSAIVLYVLLAAAAHSAFAADPGDTICIGYHANNSTDTVDTVLEKNVTVTHSVNL
LED SHNGKLC LKGIAPLQLGKCN IAGWLLGNPECDLLLTASSWSYIVETSNS ENGTCYPGDFIDYEELREQLS
SVSSFEKFEIFPKTSSWP NHETTKGVTAACSYAGASSFYRNLLWLTKKGSSYPKLSKSYVNNKGKEVLVLWGVH
HPPTGTDQQS LYQNADAYVSVGSSKYNRRFTPEIAARPKVRDQAGRMNYWTLLEPGDTITFEATGNLIAPWYA
FALNRGSGSGIITSDAPVHDCNTKCQTPHGAINSSLPFQNIHPVTIGEC PKYVRSTKLRMATGLRNIPSIQSRG
LFGAIAGFIEGGWTGMIDGWYGYHHQNEQSGYAADQKSTQNAIDGITNKVNSVIEKMNTQFTAVGKEFNLER
RIENLNKKVDDGFLDIWTYNAELLV LLENERTLDFHDSNVRNLYEKVKSQ LKNNAKEIGNGCFEFYHKCDDACM
ESVRNGTYDYPKYSEESKLNREEIDGVS GGGGLNDIFEAQKIEWHERLVPRGSPGSGYIPEAPRDGQAYVRKDG
EWVLLSTFLGHHHHHH
```

### >A/WSN/1933 (H1N1)

```
MVLVNQSHQG FNKEHTSKMVSAIVLYVLLAAAAHSAFAADPGDTICIGYHANNSTDTVDTIFEKNVAVTHSVNL
LED RHNGKLC LKGIAPLQLGKCNITGWLLGNPECDLLPARSWSYIVETPNSENGACYPGDFIDYEELREQLS
SVSSLERFEIFPKESSWP NHFTFNGVTVSCSHRGKSSFYRNLLWLTKKGDSYPKLTNSYVNNKGKEVLVLWGVH
PSSSDEQQS LYSNGNAYVSVASSNYNRRFTPEIAARPKVKDQHGRMNYWTLLEPGDTIIFEATGNLIAPWYAF
ALSRGFESGIITSNASMHECNTKCQTPQGSINSNLPFQNIHPVTIGEC PKYVRSTKLRMVTGLRNIPSIQYRGL
FGAIAGFIEGGWTGMIDGWYGYHHQNEQSGYAADQKSTQNAINGITNKVNSIIEKMNTQFTAVGKEFNLEKR
MENLNKKVDDGFLDIWTYNAELLV LLENERTLDFHDLNVKNLYEKVKSQ LKNNAKEIGNGCFEFYHKCDNECME
SVRNGTYDYPKYSEESKLNREKIDGVS GGGGLNDIFEAQKIEWHERLVPRGSPGSGYIPEAPRDGQAYVRKDG
WVLLSTFLGHHHHHH
```

### >A/Puerto Rico/8/1934 (H1N1)

```
MVLVNQSHQG FNKEHTSKMVSAIVLYVLLAAAAHSAFAADPGDTICIGYHANNSTDTVDTVLEKNVTVTHSVNL
LED SHNGKLCRLKGIAPLQLGKCN IAGWLLGNPECDPLLPVRSWSYIVETPNSENGICYPGDFIDYEELREQLS
SVSSFERFEIFPKESSWP NHNTNGVTAACSHGKSSFYRNLLWLTEKEGSYPKLNKSYVNNKGKEVLVLWGIHH
PPNSKEQQNLYQENAYVSVVTSNYNRRFTPEIAERP KVRDQAGRMNYWTL LKPGDTIIFEANGNLIAPMYAF
ALSRGFSGSIITSNASMHECNTKCQTP LGAINSSLPYQNIHPVTIGEC PKYVRS AKLRMVTGLRNIPSIQSRGL
FGAIAGFIEGGWTGMIDGWYGYHHQNEQSGYAADQKSTQNAINGITNKVNTVIEKMNIQFTAVGKEFNKLEKR
MENLNKKVDDGFLDIWTYNAELLV LLENERTLDFHDSNVKNLYEKVKSQ LKNNAKEIGNGCFEFYHKCDNECME
SVRNGTYDYPKYSEESKLNREKVDGVS GGGGLNDIFEAQKIEWHERLVPRGSPGSGYIPEAPRDGQAYVRKDG
WVLLSTFLGHHHHHH
```

### >A/AA/Marton/1943 (H1N1)

```
MVLVNQSHQG FNKEHTSKMVSAIVLYVLLAAAAHSAFAADPGDTICIGYHANNSTDTVDTVLEKNVTVTHSVNL
LED SHNGKLCRLKGIAPLQLGKCN IAGWILGNPECESLLSERSWSYIVETPNSENGTCYPGDFIDYEELREQLS
SVSSFERFEIFSKESSWP KHNTTRGVTAACSHAGKSSFYRNLLWLTEKDGSPNLNNSYVNNKGKEVLVLWGVH
```

HPSNIKDQQTLYQKENAYVSVVSSSNYNRRFTPEIAERP KVRGQAGRMNYYWTLLKPGDTIMFEANGNLIAPWYA  
FALS RGF GSGI I TSNASMH ECDTKCQTPQGA INSSLPFQNIHPVTIG ECPKYVRSTKLRMVTGLRNI PSIQSRG  
LFGAIAGFIEGGWTGMIDGWYGYHHQNEQSGSYAADQKSTQNAINGITNKVNSVIEKMNTQFTAVGKEFNLEK  
RMENLNKKVDDGFLDIWTYNAELLVLENERLDFHDSNVKNLYEKVKNQLRNNAKEIGNGCFEFYHKCNNECM  
ESVKNGTYDYPKYSEESKLNREKIDSGGGGLNDIFEAQKIEWHERLVPRGSPGSGYIPEAPRDGQAYVRKDGEW  
VLLSTFLGHHHHHH

**>A/duck/Alberta/345/1976 (H1N1)**

MVLVNQSHQGFNKEHTSKMVS AIVLYVLLAAAAHS AFAADPGDTICVGYHANNSTDTVDTVLEKNVTVTHSVNL  
LED SHNGKLC SLNGIAPLQLGKCNVAGWLLGNPECDLLLTANSWSYI IETSNS ENGTCYPGEFIDYEELREQLS  
S I S S F E K F E I F P K A S S W P N H E T T K G V T A A C S Y S G A S S F Y R N L L W I T K K G T S Y P K L S K S Y T N N K G K E V L V L W G V H  
H P P S V S E Q Q S L Y Q N A D A Y V S V G S S K Y N R R F A P E I A A R P E V R G Q A G R M N Y Y W T L L D Q G D T I T F E A T G N L I A P W Y A  
F A L N K G S D S G I I T S D A P V H N C D T R C Q T P H G A L N S S L P F Q N V H P I T I G E C P K Y V K S T K L R M A T G L R N V P S I Q S R G  
L F G A I A G F I E G G W T G M I D G W Y G Y H H Q N E Q S G S Y A A D Q K S T Q N A I D G I T N K V N S V I E K M N T Q F T A V G K E F N N L E R  
R I E N L N K K V D D G F L D I W T Y N A E L L V L L E N E R T L D F H D S N V R N L Y E K V K S Q L R N N A K E I G N G C F E F Y H K C D D E C M  
E S V K N G T Y D Y P K Y S E E S K L N R E E I D S G G G L N D I F E A Q K I E W H E R L V P R G S P G S G Y I P E A P R D G Q A Y V R K D G E W  
V L L S T F L G H H H H H H

**>A/USSR/90/1977 (H1N1)**

MVLVNQSHQGFNKEHTSKMVS AIVLYVLLAAAAHS AFAADPGDTICIGYHANNSTDTVDTVLEKNVTVTHSVNL  
LED SHNGKLCRLKGIAPLQLGKCNIA GWILGNPECESLFSKKSWSYIAETPNSENGTCYPGYFADYEELREQLS  
S V S S F E R F E I F P K E R S W P K H N V T R G V T A S C S H K G K S S F Y R N L L W L T E K N G S Y P N L S K S Y V N N K E K E V L V L W G V H  
H P S N I E D Q K T I Y R K E N A Y V S V V S S N Y N R R F T P E I A E R P K V R G Q A G R I N Y Y W T L L E P G D T I I F E A N G N L I A P W H A  
F A L N R G F G S G I I T S N A S M D E C D T K C Q T P Q G A I N S S L P F Q N I H P V T I G E C P K Y V R S T K L R M V T G L R N I P S I Q S R G  
L F G A I A G F I E G G W T G M I D G W Y G Y H H Q N E Q S G S Y A A D Q K S T Q N A I N G I T N K V N S V I E K M N T Q F T A V G K E F N K L E K  
R M E N L N K K V D D G F L D I W T Y N A E L L V L L E N E R T L D F H D S N V K N L Y E K V K S Q L K N N A K E I G N G C F E F Y H K C N N E C M  
E S V K N G T Y D Y P K Y S E E S K L N R E K I D S G G G L N D I F E A Q K I E W H E R L V P R G S P G S G Y I P E A P R D G Q A Y V R K D G E W  
V L L S T F L G H H H H H H

**>A/Singapore/6/1986 (H1N1)**

MVLVNQSHQGFNKEHTSKMVS AIVLYVLLAAAAHS AFAADPGDTICIGYHANNSTDTVDTVLEKNVTVTHSVNL  
LED SHNGKLCRLKGIAPLQLGNC SIAGWILGNPECESLFSKKSWSYIAETPNSENGTCYPGYFADYEELREQLS  
S V S S F E R F E I F P K E S S W P N H T V T K G V T A S C S H K G R S S F Y R N L L W L T K K N G S Y P N L S K S Y V N N K E K E V L V L W G V H  
H P S N I G D Q R A I Y H T E N A Y V S V V S S H Y N R R F T P E I A K R P K V R D Q E G R I N Y Y W T L L E P G D T I I F E A N G N L I A P W Y A  
F A L S R G F G S G I I T S N A S M D E C D A K C Q T P Q G A I N S S L P F Q N V H P V T I G E C P K Y V R S T K L R M V T G L R N I P S I Q S R G  
L F G A I A G F I E G G W T G M I D G W Y G Y H H Q N E Q S G S Y A A D Q K S T Q N A I N G I T N K V N S V I E K M N T Q F T A V G K E F N K L E R  
R M E N L N K K V D D G F L D I W T Y N A E L L V L L E N E R T L D F H D S N V K N L Y E K V K S Q L K N N A K E I G N G C F E F Y H K C N N E C M  
E S V K N G T Y D Y P K Y S E E S K L N R E K I D S G G G L N D I F E A Q K I E W H E R L V P R G S P G S G Y I P E A P R D G Q A Y V R K D G E W  
V L L S T F L G H H H H H H

**>A/Texas/36/1991 (H1N1)**

MVLVNQSHQGFNKEHTSKMVS AIVLYVLLAAAAHS AFAADPGDTICIGYHANNSTDTVDTVLEKNVTVTHSVNL  
LED SHNGKLCRLKGIAPLQLGNC SVAGWILGNPKCESLFSKESWSYIAETPNPENGTCPYGYFADYEELREQLS  
S V S S F E R F E I F P K E S S W P N H T V T K G V T T S C S H N G K S S F Y R N L L W L T E K N G L Y P N L S K S Y V N N K E K E V L V L W G V H  
H P S N I R D Q R A I Y H T E N A Y V S V V S S H Y S R R F T P E I A K R P K V R G Q E G R I N Y Y W T L L E P G D T I I F E A N G N L I A P W Y A  
F A L S R G F G S G I I T S N A S M D E C D A K C Q T P Q G A I N S S L P F Q N V H P V T I G E C P K Y V R S T K L R M V T G L R N I P S I Q S R G  
L F G A I A G F I E G G W T G M I D G W Y G Y H H Q N E Q S G S Y A A D Q K S T Q N A I N G I T N K V N S V I E K M N T Q F T A V G K E F N K L E R  
R M E N L N K K V D D G F L D I W T Y N A E L L V L L E N G R T L D F H D S N V K N L Y E K V K S Q L K N N A K E I G N G C F E F Y H K C N N E C M  
E S V K N G T Y D Y P K Y S E E S K L N R G K I D S G G G L N D I F E A Q K I E W H E R L V P R G S P G S G Y I P E A P R D G Q A Y V R K D G E W  
V L L S T F L G H H H H H H

**>A/Beijing/262/1995 (H1N1)**

MVLVNQSHQGFNKEHTSKMVS AIVLYVLLAAAAHS AFAADPGDTICIGYHANNSTDTVDTVLEKNVTVTHSVNL  
LED SHNGKLCRLKGIAPLQLGNC SVAGWILGNPECESLISKESWSYIVETPNPENGTCPYGYFADYEELREQLS



SVSSFERFEIFPKESSWPNHTVTGVTASC SHNGKSSFYRNLLWLTEKNGLYPNLSNSYVNNKEKEVLVLWGVHH  
PSNIGVQRAIYHTENAYVSVVSSHYSRRFTPEIAKRPKVRGQEGRINYWTLLLEPGDTIIIFEANGNLIAPWYAF  
ALSRGFGSGIITSNAPMNECDAKCQTPQGAINSSLPFQNVHPVTIGECPKYVRSTKLRMVTGLRNIPSIQSRGL  
FGAIAGFIEGGWTGMMDGWYGYHHQNEQSGSYAADQKSTQNAINGITNKVNSVIEKMNTQFTAVGKEFNKLERR  
MENLNKKVDDGFLLDIWYTNAELLVLENERLDFHDSNVKNLYEKVKSQKNNAKEIGNGCFEFYHKCNNECME  
SVKNGTYDYPKYSEESKLNREKIDSGGGGLNDIFEAQKIEWHERLVPRGSPGSGYIPEAPRDGQAYVRKDGEWV  
LLSTFLGHHHHHH

**>A/New Caledonia/20/1999 (H1N1)**

MVLVNQSHQGFNKEHTSKMVSIAIVLYVLLAAAAHSAFAADPGDTICIGYHANNSTDTVDTVLEKNVTVTHSVNL  
LED SHNGKLCRLKGIAPLQLGNC SVAGWILGNPECELLISKESWSYIVETPNPENGTCYPGYFADYEELREQLS  
SVSSFERFEIFPKESSWPNHTVTGVSASC SHNGKSSFYRNLLWLTGKNGLYPNLSKSYVNNKEKEVLVLWGVHH  
PPNIGNQRALYHTENAYVSVVSSHYSRRFTPEIAKRPKVRDQEGRINYWTLLLEPGDTIIIFEANGNLIAPWYAF  
ALSRGFGSGIITSNAPMDECDAKCQTPQGAINSSLPFQNVHPVTIGECPKYVRS AKLRMVTGLRNIPSIQSRGL  
FGAIAGFIEGGWTGMVDGWYGYHHQNEQSGSYAADQKSTQNAINGITNKVNSVIEKMNTQFTAVGKEFNKLERR  
MENLNKKVDDGFLLDIWYTNAELLVLENERLDFHDSNVKNLYEKVKSQKNNAKEIGNGCFEFYHKCNNECME  
SVKNGTYDYPKYSEESKLNREKIDSGGGGLNDIFEAQKIEWHERLVPRGSPGSGYIPEAPRDGQAYVRKDGEWV  
LLSTFLGHHHHHH

**>A/Solomon Islands/3/2006 (H1N1)**

MVLVNQSHQGFNKEHTSKMVSIAIVLYVLLAAAAHSAFAADPGDTICIGYHANNSTDTVDTVLEKNVTVTHSVNL  
LED SHNGKLCRLKGIAPLQLGNC SVAGWILGNPECELLISRESWSYIVEKPNPENGTCYPGHFADYEELREQLS  
SVSSFERFEIFPKESSWPNHTTTGVSASC SHNGESSFYKNLLWLTGKNGLYPNLSKSYANNKEKEVLVLWGVHH  
PPNIGDQRALYHKENAYVSVVSSHYSRKFTPEIAKRPKVRDQEGRINYWTLLLEPGDTIIIFEANGNLIAPRYAF  
ALSRGFGSGIINSNAPMDECDAKCQTPQGAINSSLPFQNVHPVTIGECPKYVRS AKLRMVTGLRNIPSIQSRGL  
FGAIAGFIEGGWTGMVDGWYGYHHQNEQSGSYAADQKSTQNAINGITNKVNSVIEKMNTQFTAVGKEFNKLERR  
MENLNKKVDDGFLLDIWYTNAELLVLENERLDFHDSNVKNLYEKVKSQKNNAKEIGNGCFEFYHKCNDECME  
SVKNGTYDYPKYSEESKLNREKIDSGGGGLNDIFEAQKIEWHERLVPRGSPGSGYIPEAPRDGQAYVRKDGEWV  
LLSTFLGHHHHHH

**>A/California/04/2009 HA2 E54G (H1N1)**

MVLVNQSHQGFNKEHTSKMVSIAIVLYVLLAAAAHSAFAADPGDTLCIGYHANNSTDTVDTVLEKNVTVTHSVNL  
LEDKHNGKLCCKLRGVAPLHLGKCNIA GWILGNPECESLSTASSWSYIVETPSSDNGTCYPGDFIDYEELREQLS  
SVSSFERFEIFPKTSSWPNHDSNKGVTAACPHAGAKSFYKNLIWLKKNVSYPKLSKSYINDKGKEVLVLWGIH  
HPSTSADQQSLYQADTYVVFVGS SRYSKFKPEIAIRPKVRDQEGRMNYWTLEPGDKITFEATGNLVVPRYA  
FAMERNAGSGIISDTPVHDCNTTCQTPKGAINSSLPFQNIHPITIGKCPKYVKSTKLRLATGLRNIPSIQSRG  
LFGAIAGFIEGGWTGMVDGWYGYHHQNEQSGSYAADLSTQNAIDGITNKVNSVIEKMNTQFTAVGKEFNHLEK  
RIENLNKKVDDGFLLDIWYTNAELLVLENERLDFHDSNVKNLYEKVRSQKNNAKEIGNGCFEFYHKCDNTCM  
ESVKNGTYDYPKYSEEAKLNREEIDSGGGGLNDIFEAQKIEWHERLVPRGSPGSGYIPEAPRDGQAYVRKDGEW  
VLLSTFLGHHHHHH

**>A/Japan/305/1957 (H2N2)**

MVLVNQSHQGFNKEHTSKMVSIAIVLYVLLAAAAHSAFAADPGDQICIGYHANNSTEKVDITLERNVTVTHAKDI  
LEKTHNGKLCCKLNGIPPLELGDCSIAGWLLGNPECDRLLSVPEWSYIMEKENPRDGLCYPGSFNDYEELKHLLS  
SVKHFEKVKILPKDRWTQHTTTGGSRAVSGNPSFFRNMVWLTEKGSNYPVAKGSYNNSTSGEQMLI IWGVHHP  
NDETEQRTLYQNVGTYSVGTSTLNKRSTPEIATRPKVNGQGRMEFSWTL LDMWDTINFESTGNLIAPEYGFK  
ISKRGSSGIMKTEGTLENCETKCQTP LGAINSTLPPHNHPLTIGECPKYVKSEKLVLATGLRNVPQIESRGLF  
GAIAGFIEGGWQGMVDGWYGYHHSNDQSGSYAADKESTQKAFDGI TNKVNSVIEKMNTQFEAVGKEFSNLERRL  
ENLNKKMEDGFLLDVWYTNAELLVLMENERLDFHDSNVKNLYDKVRMQLRDNV KELGNGCFEFYHKCDDECMS  
VKNGTYDYPKYEEEEKLNREIKSGGGGLNDIFEAQKIEWHERLVPRGSPGSGYIPEAPRDGQAYVRKDGEWV  
LSTFLGHHHHHH

**>A/Adachi/2/1957 (H2N2)**

MVLVNQSHQGFNKEHTSKMVS AIVLYVLLAAAAHS AFAADPGDQICIGYHANNSTEKVDTILERNVTVTHAKDI  
LEKTHNGKLCCKLNGIPPLELGDCSIAGWLLGNPECDRLLSVPEWSYIMEKENPRNGLCYPGSFNDYEELKHLSS  
SVKHFEKVKILPKDRWTQHTTTGGSQACAVSGNPSFFRNMVWLTKKGSDYPVAKGSYNNTSGEQMLI IWGVHHP  
IDETEORTLYQNVGTYSVGTSTLNKRSTPEIATRPKVNLGSRMEFSWTL LDMWDTINFESTGNLIAPEYGFK  
ISKRGSSGIMKTEGTLENCETKCQTP LGAIN T TLPFHNVHPLTIGECPKYVKSEKLVLATGLRNVPQIESRGLF  
GAIAGFIEGGWQGMVDGWYGYHHSNDQGSYAADKESTQKAFDGITNKVNSVIEKMNTQFEAVGKEFGNLERLL  
ENLNKKMEDGFLDVWTYNAELLVLMENERTLDFHDSNVKNLYDKVRMQLRDNVKELGNGCFEFYHKCDECMNS  
VKNGTYDYPKYEEESKLNREIKSGGGGLNDIFEAQKIEWHERLVPRGSPGSGYIPEAPRDGQAYVRKDG EWVL  
LSTFLGHHHHHH

**>A/duck/Ukraine/1/1963 (H3N8)**

MVLVNQSHQGFNKEHTSKMVS AIVLYVLLAAAAHS AFAADPGATLCLGHHAVPNGTIVKTIITDDQIEVTNATEL  
VQSSSTGKICNNPHRILDGRAC TLIDALLGDPHCDVFQNETWDLFVERSNAF SNCYPYDIPDYASLRSLVASSG  
TLEFITEGFTWTGVTQNGGSSACKRGPANGFFSRLNWLTKSEAYPVLNVTMPNNDNF DKLYI IWGVHHPSTNQE  
QTDLYVQASGRVTVSTRSQQTII PNIGSRPWVRGQPGRISIYWTIVKPGDVLVINSNGNLIAPRGYFKMRTGK  
SSIMRSDAPI DTCISECITPNGSIPNDKPFQNVNKITYGACPKYVKQNTLKLATGMRNVPGKQTRGLFGAIAGF  
IENGWEGMIDGWYGFRHQNSEGTQAADLKSTQAAIDQINRKLNRVIEKTNEKFHQIEKEFSEVEGRIQDLEKY  
VEDTKIDLWSYNAELLVALENQHTIDLADSEM NKLF EKTRRQLRENAEDMGNGCFKIYHKCDNACIESIRNGTY  
DHD IYRDEALNNRFQIKGVSGGGGLNDIFEAQKIEWHERLVPRGSPGSGYIPEAPRDGQAYVRKDG EWVLLSTF  
LGHHHHHH

**>A/Hong Kong/1/1968 (H3N2)**

MVLVNQSHQGFNKEHTSKMVS AIVLYVLLAAAAHS AFAADPGATLCLGHHAVPNGTLVKTITDDQIEVTNATEL  
VQSSSTGKICNNPHRILDGIDCTLIDALLGDPHCDVFQNETWDLFVERSKAF SNCYPYDVPDYASLRSLVASSG  
TLEFITEGFTWTGVTQNGGSSACKRGP GSGFFSRLNWLTKSGSTYPVLNVTMPNNDNF DKLYI IWGVHHPSTNQE  
QTSLYVQASGRVTVSTRSQQTII PNIGSRPWVRLSSRISIYWTIVKPGDVLVINSNGNLIAPRGYFKMRTGK  
SSIMRSDAPI DTCISECITPNGSIPNDKPFQNVNKITYGACPKYVKQNTLKLATGMRNVPEKQTRGLFGAIAGF  
IENGWEGMIDGWYGFRHQNSEGTQAADLKSTQAAIDQINGKLN RVIEKTNEKFHQIEKEFSEVEGRIQDLEKY  
VEDTKIDLWSYNAELLVALENQHTIDLTDSEM NKLF EKTRRQLRENAEDMGNGCFKIYHKCDNACIESIRNGTY  
DHDVYRDEALNNRFQIKGVSGGGGLNDIFEAQKIEWHERLVPRGSPGSGYIPEAPRDGQAYVRKDG EWVLLSTF  
LGHHHHHH

**>A/Victoria/3/1975 (H3N2)**

MVLVNQSHQGFNKEHTSKMVS AIVLYVLLAAAAHS AFAADPGATLCLGHHAVPNGTLVKTITNDQIEVTNATEL  
VQSSSTGKICNNPHRILDGINCTLIDALLGDPHCDG FQNEKWDLFVERSKAF SNCYPYDVPDYASLRSLVASSG  
TLEFINEGFNWTGVTQNGGSSACKRGPDSGFFSRLNWLYKSGSTYPVQNVTMPNNDNSDKLYI IWGVHHPSTDKE  
QTNLYVQASGKVTVSTKRSQQTII PNIVGSRPWVRLSSRISIYWTIVKPGDILVINSNGNLIAPRGYFKMRTGK  
SSIMRSDAPI GTCSSSECITPNGSIPNDKPFQNVNKITYGACPKYVKQNTLKLATGMRNVPEKQTRGIFGAIAGF  
IENGWEGMIDGWYGFRHQNSEGTQAADLKSTQAAIDQINGKLN RVIEKTNEKFHQIEKEFSEVEGRIQDLEKY  
VEDTKIDLWSYNAELLVALENQHTIDLTDSEM NKLF EKTRRQLRENAEDMGNGCFKIYHKCDNACIGSIRNGTY  
DHDVYRDEALNNRFQIKGVSGGGGLNDIFEAQKIEWHERLVPRGSPGSGYIPEAPRDGQAYVRKDG EWVLLSTF  
LGHHHHHH

**>A/Bangkok/1/1979 (H3N2)**

MVLVNQSHQGFNKEHTSKMVS AIVLYVLLAAAAHS AFAADPGATLCLGHHAVPNGTLVKTITNDQIEVTNATEL  
VQSSSTGRICDSPHRILDGKNCTLIDALLGDPHCDG FQNEKWDLFVERSKAF SNCYPYDVPDYASLRSLVASSG  
TLEFINEGFNWTGVTQSGGSYACKRGS DNSFFSRLNWLYESES KYPVLNVTMPNNGNF DKLYI IWGVHHPSTDKE  
QTNLYVRASGRVTVSTKRSQQTII PNIGSRPWVRLSSRISIYWTIVKPGDILLINSNGNLIAPRGYFKIRTKG  
SSIMRSDAPI GTCSSSECITPNGSIPNDKPFQNVNKITYGACPKYVKQNTLKLATGMRNVPEKQTRGIFGAIAGF  
IENGWEGMVDGWYGFRHQNSEGTQAADLKSTQAAIDQINGKLN RVIEKTNEKFHQIEKEFSEVEGRIQDLEKY  
VEDTKIDLWSYNAELLVALENQHTIDLTDSEM NKLF EKTRRQLRENAEDMGNGCFKIYHKCDNACIGSIRNGTY  
DHDVYRDEALNNRFQIKGVSGGGGLNDIFEAQKIEWHERLVPRGSPGSGYIPEAPRDGQAYVRKDG EWVLLSTF  
LGHHHHHH

**>A/Leningrad/360/1986 (H3N2)**

MVLVNQSHQGFNKEHTSKMVS AIVLYVLLAAAAHS AFAADPGATLCLGHHAVPNGTLVKTIITNDQIEVTNATEL  
VQSSSTGRICDSPHRILDGKNCTLIDALLGDPHCDGFQNEKWDLFIERSKAFSNCYPYDVPDYASLRSLVASSG  
TLEFINEGFNWTGVTQSGGSYTCRGSVNSFFSRLNWL YESEYKYPALNVTMPNNGKFDKLYIWGVHHPSTEKE  
QTNLYVRASGRVTVSTKRSQQTVIPNIGSRPWVRLSSRISIYWTIVKPGDILLINSTGNLIAPRGYFKIRTKG  
SSIMRSDAPIGTCSSSECITPNGSIPNDKPFQNVNKITYGACPRYVKQNTLKLATGMRNVPEKQTRGIFGAIAGF  
IENGWEGMVDGWYGFRHQNSEGTGQAADLKSTQAAIDQINGKLNRLIEKTNEKFHQIEKEFSEVEGRIQDLEKY  
VEDTKIDLWSYNAELLVALENQYTI DLTDSEMKNLF EKTRKQLRENAEDMGNGCFKIYHKCDNACIGSIRNGTY  
DHDVYRDEALNNRFQIKGVSGGGGLNDIFEAQKIEWHERLVPRGSPGSGYIPEAPRDGQAYVRKDG EWVLLSTF  
LGHHHHHH

**>A/Beijing/353/1989 (H3N2)**

MVLVNQSHQGFNKEHTSKMVS AIVLYVLLAAAAHS AFAADPGATLCLGHHAVPNGTLVKTIITNDQIEVTNATEL  
VQSSSTGRICDSPHRILDGKNCTLIDALLGDPHCDGFQNEKWDLFVERS KAYSNCYPYDVPDYASLRSLVASSG  
TLEFINEDFNWTGVAQSGESYACKRGSVKSFFSRLNWLHESEYKYPALNVTMPNNGKFDKLYIWGVHHPSTDRE  
QTNLYVRASGRVTVSTKRSQQTVIPNIGSRPWVRLSSRISIYWTIVKPGDILLINSTGNLIAPRGYFKIRTKG  
SSIMRSDAPIGTCSSSECITPNGSIPNDKPFQNVNRITYGACPRYVKQNTLKLATGMRNVPEKQTRGIFGAIAGF  
IENGWEGMVDGWYGFRHQNSEGTGQAADLKSTQAAIDQINGKLNRLIEKTNEKFHQIEKEFSEVEGRIQDLEKY  
VEDTKIDLWSYNAELLVALENQHTIDLTDSEMKNLF EKTRKQLRENAEDMGNGCFKIYHKCDNACIGSIRNGTY  
DHDVYRDEALNNRFQIKGVSGGGGLNDIFEAQKIEWHERLVPRGSPGSGYIPEAPRDGQAYVRKDG EWVLLSTF  
LGHHHHHH

**>A/Shangdong/9/1993 (H3N2)**

MVLVNQSHQGFNKEHTSKMVS AIVLYVLLAAAAHS AFAADPGATLCLGHHAVPNGTLVKTIITNDQIEVTNATEL  
VQSSSTGRICGSPHRILDGKNCTLIDALLGDPHCDGFQNEKWDLFVERS KAYSNCYPYDVPDYASLRSLVASSG  
TLEFINEDFNWTGVAQDGGSYACKRGSVNSFFSRLNWLHKLEYKYPALNVTMPNNGKFDKLYIWGVHHPSTDSD  
QTSLYVRASGRVTVSTKRSQQT VTPNIGSRPWVRGQSSRISIYWTIVKPGDILLINSTGNLIAPRGYFKIRNGK  
SSIMRSDAPIGNCSSSECITPNGSIPNDKPFQNVNRITYGACPRYVKQNTLKLATGMRNVPEKQTRGIFGAIAGF  
IENGWEGMVDGWYGFRHQNSEGTGQAADLKSTQAAIDQINGKLNRLIEKTNEKFQQIEKEFSEVEGRIQDLEKY  
VEDTKIDLWSYNAELLVALENQHTIDLTDSEMKNLF EKTRKQLRENAEDMGNGCFKIYHKCDNACIGSIRNGTY  
DHDVYRDEALNNRFQIKGVSGGGGLNDIFEAQKIEWHERLVPRGSPGSGYIPEAPRDGQAYVRKDG EWVLLSTF  
LGHHHHHH

**>A/Panama/2007/1999 (H3N2)**

MVLVNQSHQGFNKEHTSKMVS AIVLYVLLAAAAHS AFAADPGATLCLGHHAVSNGTLVKTIITNDQIEVTNATEL  
VQSSSTGRICDSPHQILDGENCTLIDALLGDPHCDGFQNEKWDLFVERS KAYSNCYPYDVPDYASLRSLVASSG  
TLEFNNEFSNWTGVAQNGTSSACKRRSNKSFFSRLNWLHQ LKYKYPALNVTMPNNEKFDKLYIWGVLHPSTDSD  
QISLYAQASGRVTVSTKRSQQTVIPNIGSRPWV RGVSSRISIYWTIVKPGDILLINSTGNLIAPRGYFKIRSGK  
SSIMRSDAPIGKCNSECITPNGSIPNDKPFQNVNRITYGACPRYVKQNTLKLATGMRNVPEKQTRGIFGAIAGF  
IENGWEGMVDGWYGFRHQNSEGTGQAADLKSTQAAINQINGKLNRLIEKTNEKFHQIEKEFSEVEGRIQDLEKY  
VEDTKIDLWSYNAELLVALENQHTIDLTDSEMKNLF ERTKQLRENAEDMGNGCFKIYHKCDNACIGSIRNGTY  
DHDVYRDEALNNRFQIKGVSGGGGLNDIFEAQKIEWHERLVPRGSPGSGYIPEAPRDGQAYVRKDG EWVLLSTF  
LGHHHHHH

**>A/Moscow/10/1999 (H3N2)**

MVLVNQSHQGFNKEHTSKMVS AIVLYVLLAAAAHS AFAADPGATLCLGHHAVPNGTLVKTIITNDQIEVTNATEL  
VQSSSTGRICDSPHQILDGENCTLIDALLGDPHCDGFQNEKWDLFVERS KAYSNCYPYDVPDYASLRSLVASSG  
TLEFNNEFSNWTGVAQNGTSSACKRRSINSFFSRLNWLHQ LKYRYPALNVTMPNNDKFDKLYIWGVHHPSTDSD  
QTSLYTQASGRVTVSTKRSQQTVIPNIGSRPWV RGISSRISIYWTIVKPGDILLIKSTGNLIAPRGYFKIRSGK  
SSIMRSDAPIGKCNSECITPNGSIPNDKPFQNVNRITYGACPRYVKQNTLKLATGMRNVPEKQTRGIFGAIAGF  
IENGWEGMMDGWYGFRHQNSEGTGQAADLKSTQAAINQINGKLNRLIEKTNEKFHQIEKEFSEVEGRIQDLEKY  
VEDTKIDLWSYNAELLVALENQHTIDLTDSEMKNLF ERTKQLRENAEDMGNGCFKIYHKCDNACIGSIRNGTY  
DHDVYRDEALNNRFQIKGVSGGGGLNDIFEAQKIEWHERLVPRGSPGSGYIPEAPRDGQAYVRKDG EWVLLSTF  
LGHHHHHH

**>A/Wyoming/3/2003 (H3N2)**

MVLVNQSHQGFNKEHTSKMVS AIVLYVLLAAAAHS AFAADPGATLCLGHHAVPNGTIVKTIITNDQIEVTNATEL  
VQSSSTGGICDSPHQILDGENCTLIDALLGDPQCDGFQNKKWDLFVERS KAYSNCYPYDVPDYASLRSLVASSG  
TLEFNNE SFNWAGVTQNGTSSACKRRSNKSF SRNLNWLTHLKYKYPALNVTMPNNEKFDKLYIWGVHHPVTDS  
QISLYAQASGRITVSTKRSQQTVIPNIGFRPRVRDISSRIS IYWTIVKPGDILLINSTGNLIAPRGYFKIRSGK  
SSIMRSDAPIGKCNSECITPNGSIPNDKPFQNVNRITYGACPRYVKQNTLKLATGMRNVPEKQTRGIFGAIAGF  
IENGWEGMVDGWYGFRHQNSEGTQAADLKTQA AINQINGKLNRLIGKTNEKFHQIEKEFSEVEGRIQDLEKY  
VEDTKIDLWSYNAELLVALENQHTIDLTDSEM NKLFERTKKQLRENAEDMGNGCFKIYHKCDNACIESIRNGTY  
DHDVYRDEALNNRFQIKGVSGGGGLNDIFE AQKIEWHERLVPRGSPGSGYIPEAPRDGQAYVRKDG EWVLLSTF  
LGHHHHHH

**>A/Brisbane/10/2007 (H3N2)**

MVLVNQSHQGFNKEHTSKMVS AIVLYVLLAAAAHS AFAADPGATLCLGHHAVPNGTIVKTIITNDQIEVTNATEL  
VQSSSTGEICDSPHQILDGENCTLIDALLGDPQCDGFQNKKWDLFVERS KAYSNCYPYDVPDYASLRSLVASSG  
TLEFNNE SFNWTGVTQNGTSSACIRRSNNSFFSRNLNWLTHLKFYKYPALNVTMPNNEKFDKLYIWGVHHPGTDND  
QIFPYAQASGRITVSTKRSQQTVIPNIGSRPRVRNIPSRIS IYWTIVKPGDILLINSTGNLIAPRGYFKIRSGK  
SSIMRSDAPIGKCNSECITPNGSIPNDKPFQNVNRITYGACPRYVKQNTLKLATGMRNVPEKQTRGIFGAIAGF  
IENGWEGMVDGWYGFRHQNSEGIGQAADLKTQA AIDQINGKLNRLIGKTNEKFHQIEKEFSEVEGRIQDLEKY  
VEDTKIDLWSYNAELLVALENQHTIDLTDSEM NKLFERTKKQLRENAEDMGNGCFKIYHKCDNACIGSIRNGTY  
DHDVYRDEALNNRFQIKGVSGGGGLNDIFE AQKIEWHERLVPRGSPGSGYIPEAPRDGQAYVRKDG EWVLLSTF  
LGHHHHHH

**>A/Perth/16/2009 (H3N2)**

MVLVNQSHQGFNKEHTSKMVS AIVLYVLLAAAAHS AFAADPGATLCLGHHAVPNGTIVKTIITNDQIEVTNATEL  
VQSSSTGEICDSPHQILDGKNCTLIDALLGDPQCDGFQNKKWDLFVERS KAYSNCYPYDVPDYASLRSLVASSG  
TLEFNNE SFNWTGVTQNGTSSACIRRSKNSFFSRNLNWLTHLNFYKYPALNVTMPNNEQFDKLYIWGVHHPGTDKD  
QIFLYAQASGRITVSTKRSQQT VSPNIGSRPRVRNIPSRIS IYWTIVKPGDILLINSTGNLIAPRGYFKIRSGK  
SSIMRSDAPIGKCNSECITPNGSIPNDKPFQNVNRITYGACPRYVKQNTLKLATGMRNVPEKQTRGIFGAIAGF  
IENGWEGMVDGWYGFRHQNSEGRGQAADLKTQA AIDQINGKLNRLIGKTNEKFHQIEKEFSEVEGRIQDLEKY  
VEDTKIDLWSYNAELLVALENQHTIDLTDSEM NKLFERTKKQLRENAEDMGNGCFKIYHKCDNACIGSIRNGTY  
DHDVYRDEALNNRFQIKGVSGGGGLNDIFE AQKIEWHERLVPRGSPGSGYIPEAPRDGQAYVRKDG EWVLLSTF  
LGHHHHHH

**>A/Victoria/361/2011 (H3N2)**

MVLVNQSHQGFNKEHTSKMVS AIVLYVLLAAAAHS AFAADPGATLCLGHHAVPNGTIVKTIITNDQIEVTNATEL  
VQNSSIGEICDSPHQILDGENCTLIDALLGDPQCDGFQNKKWDLFVERS KAYSNCYPYDVPDYASLRSLVASSG  
TLEFNNE SFNWTGVTQNGTSSACIRRSNNSFFSRNLNWLTHLNFYKYPALNVTMPNNEQFDKLYIWGVHHPGTDKD  
QIFLYAQSSGRITVSTKRSQQA VIPNIGSRPRIRNIPSRIS IYWTIVKPGDILLINSTGNLIAPRGYFKIRSGK  
SSIMRSDAPIGKCNSECITPNGSIPNDKPFQNVNRITYGACPRYVKQSTLKLATGMRNVPEKQTRGIFGAIAGF  
IENGWEGMVDGWYGFRHQNSEGRGQAADLKTQA AIDQINGKLNRLIGKTNEKFHQIEKEFSEVEGRIQDLEKY  
VEDTKIDLWSYNAELLVALENQHTIDLTDSEM NKLFERTKKQLRENAEDMGNGCFKIYHKCDNACIGSIRNGTY  
DHDVYRDEALNNRFQIKGVSGGGGLNDIFE AQKIEWHERLVPRGSPGSGYIPEAPRDGQAYVRKDG EWVLLSTF  
LGHHHHHH

**>A/duck/Czechoslovakia/1956 (H4N6)**

MVLVNQSHQGFNKEHTSKMVS AIVLYVLLAAAAHS AFAADPGPVICMGHHAVANGTMVKT LADDQVEVVTAQEL  
VESQNLPELCPSPRLRLVDGQTCDIINGALGSPGCDHLNGAEWDVFIERPNAVDTCPYDFVPEYQSLRSILANN  
KFEFIAEEFQWNTVKQNGKSGACKRANVNDFFNRLNWLKSDGNAYPLQNLTKINNGDYARLYIWGVHHPSTDT  
EQTNLYKNNPGRVTVSTKTSQTSVVPNIGSRPLVRGQSGRVSFYWTIVEPGDLIVFNTIGNLIAPRGHYKLNNQ  
KKSTILNTAIPIGSCVSKCHTDKGSLSSTTKPFQNI SRIAVGDCPRYVKQGS LKLATGMRNIPEKASRGLFGAIA  
GFIENGWQGLIDGWYGFRHQNAEGTGTAADLKTQA AIDQINGKLNRLIEKTNDKYHQIEKEFEQVEGRIQDLE  
KYVEDTKIDLWSYNAELLVALENQHTIDVTDSEM NKLFERVRQLRENAEDKGNCGFEIFHKCDNNCIESIRNG

TYDHDIIYRDEAINNRFQIQGVSGGGGLNDIFEAQKIEWHERLVPRGSPGSGYIPEAPRDGQAYVRKDGEWVLLS  
TFLGHHHHHH

**>A/Indonesia/05/2005 (H5N1)**

MVLVNQSHQGFNKEHTSKMVSIVLYVLLAAAAHSFAAADPGDQICIGYHANNSTEQVDTIMEKNVTVTHAQDI  
LEKTHNGKLCDLGDKPLILRDCSVAGWLLGNPMCDEFINVPESYIVEKANPTNDLCYPGSFNDYEELKHLLS  
RINHFEKIQIIPKSSWSDHEASSGVSSACPYLGSFSPFRNVVWLIKKNSTYPTIKKSYNNTNQEDLLVLWGIHH  
PNDAAEQTRLYQNPTTYISIGTSTLNQRLVPKIATRISKVNGQSGRMEFFWTILKPNDAINFESNGNFIAPEYAY  
KIVKKGDSAIMKSELEYGNCNTKCQTPMGAINSSMPFHNIHPLTIGECPKYVKSRLVLRNVPQRESRRK  
KRGLFGAIAAGFIEGGWQGMVDGWYGYHHSNEQSGSYAADKESTQKAIDGVTNKVNSIIDKMNTQFEAVGREFNN  
LERRIENLNKMKMEDGFLDVWVTYNAELLVLMENERTLDFHDSNVKNLYDKVRLQLRDNAKELGNGCFEFYHKCDN  
ECMESIRNGTYNYPQYSEEARLKREEISSGGGGLNDIFEAQKIEWHERLVPRGSPGSGYIPEAPRDGQAYVRK  
GEWVLLSTFLGHHHHHH

**>A/turkey/Massachusetts/3740/1965 (H6N2)**

MVLVNQSHQGFNKEHTSKMVSIVLYVLLAAAAHSFAAADPGDKICIGYHANNSTTQVDTILEKNVTVTHSVEL  
LESQKEERFCRVLNKTPLDLKGCTIEGWILGNPQCDILLGDQSWSYIVERPGAQNGICYPGVLNEVEELKAFIG  
SGEKVQRFEMFPKSTWTGVDNNSGVTRACPYTTSGSSFYRNLWLIKTRSAAYPVIKGTYNNTGSQPILYFWGV  
HHPNPTDEQNTLYGSGDRYVRMGTESMNFAKSPEIAARPAVNGQRGRIDYWSVLKPGETLNVESNGNLIAPWY  
AYKFTSSNNKGAIFKSNLPIENCDAVCQTVAGALKTNKTFQNVSPLWIGECPKYVKSRLVLRNVPQAE  
RGLFGAIAAGFIEGGWQGMVDGWYGYHHENSQSGSYAADKESTQKAIDGITNKVNSIIDKMNTQFEAVEHEFSNL  
ERRIDNLNKRMEGFLDVWVTYNAELLVLENERTLDLHDANVKNLYEKVKSQLRDNADKLGNGCFEFWHKCDDE  
CINSVKNGTYDYPKYQDESCLNRQEIDSVSGGGGLNDIFEAQKIEWHERLVPRGSPGSGYIPEAPRDGQAYVRK  
DGEWVLLSTFLGHHHHHH

**>A/Netherlands/219/2003 (H7N7)**

MVLVNQSHQGFNKEHTSKMVSIVLYVLLAAAAHSFAAADPGDKICLGHHAVSNGTKVNTLTERGVEVFNATET  
VERTNVPRICSKGKRTVDLQCGLLGTITGPPQCDQFLEFSADLIERREGSDVCYPGKRVNVEEALRQILRESG  
GIDKETMGFTYSGIRNTGTTACRRSGSSFYAEMKWLNSNTDAAFPQMTKSYKNTRKDPALIIWGIHHSGSTT  
EQTKLYGSGNKLITVGSNNYQQSFVPSGARPVNGQSGRIDFHWLILNPNDTVTFSFNGAFIALDRASFLRGK  
SMGIQSEVQVDANCEGDCYHSGGTIISNLPFQINNSRAVGKCPRYVKQESLLLATGMKNVPEIPKRRRRGLFGA  
IAGFIEGWEGWGLIDGWYGFRHQNAQGGETAADYKSTQSAIDQITGKLNRLIEKTNQQFELIDNEFTTEVERQIGN  
VINWTRDSMTEVWSYNAELLVAMENQHTIDLADSEMKNLYERVKRQLRENAEEDGTGCFEIFHKCDDDCMASIR  
NNTYDHSKYREEAIQNRIQIDPVSGGGGLNDIFEAQKIEWHERLVPRGSPGSGYIPEAPRDGQAYVRKDGEWV  
LSTFLGHHHHHH

**>A/chicken/Germany/N/1949 (H10N7)**

MVLVNQSHQGFNKEHTSKMVSIVLYVLLAAAAHSFAAADPGDRICLGHHAVANGTIVKTLTNEQEEVTNATET  
VESTNLNKLCKMGRSYKDLGNCHPVGMLIGTPVCDPHLTGTWDTLIERENAIHACYPGATINEEALRQKIMESG  
GISKMTSGFTYGSINSAGTTKACMRNGGDSFYAELKWLVSKTGKQNFQTTNTYRNTDAAEHLIIWGIHHPSS  
TQEKNDLYGTQSLSISVESSTYQNNFVVPVVGARPVNGQSGRIDFHWLTVQPGDNITFSHNGGLIAPSRVSKLT  
GRGLGIQSEALIDNSCESKCFWRGGSINTKLPFQNLSPRTVQCPKYVNRSLLLATGMRNVPEVVQGRGLFGA  
IAGFIEGWEGWGLIDGWYGFRHQNAQGGTQAADYKSTQAADQITGKLNRLIEKTNTEFESIESEFSETEHQIGN  
VINWTKDSITDIWTYQAELLVAMENQHTIDMADSEMKNLYERVKRQLRQNAEEDGKGCFEIYHTCDDSCMESIR  
NNTYDHSQYREEALLNRLNINSVSGGGGLNDIFEAQKIEWHERLVPRGSPGSGYIPEAPRDGQAYVRKDGEWV  
LSTFLGHHHHHH

**>A/duck/Alberta/60/1976 (H12N5)**

MVLVNQSHQGFNKEHTSKMVSIVLYVLLAAAAHSFAAADPGDKICIGYQTNNSTETVNTLSEQNVVPTQVEEL  
VHGGIDPILCGTELGSPVLVDDCSLEGLIILGNPKCDLYLNGREWSYIVERPKEMEGVCYPGSIENQEELRSLFS  
SIKKYERVKMFDFTKWNVTYTGTSKACNNTSNQGSFYRSMRWLTLKSGQFPVQTDEYKNTRDSDIVFTWAIHHP  
PTSDEQVKLYKNPDTLSSVTTDEINRSFKPNIGRPLVRGQQGRMDY YWAVLKPQGTVKIQTNGLIAPYGH  
ITGKSHGRILKNNLPMGQCVTECQLNEGVMNTSKPFQNTSKHYIGKCPKYIPSGSLKLAIGLRNVPVQVDRGLF  
GAIAGFIEGGWVPLVAGWYGFHQHNAEGTGIAADRSTQRAIDNMQNKLNVIDKMNKQFEVNVNHEFSEVESRI

NMINSKIDDQITDIWAYNAELLVLLLENQKTLDEHDANVRNLHDRVRRVLRENAIDTGDGCFEILHKCDNNCMDT  
IRNGTYNHKEYEEESKIERQKVNGVSGGGGLNDIFEAQKIEWHERLVPRGSPGSGYIPEAPRDGQAYVRKDGEW  
VLLSTFLGHHHHHH

**>A/gull/Maryland/704/1977 (H13N6)**

MVLVNQSHQGFNKEHTSKMVSAIVLYVLLAAAAHSFAAADPGDRICVGYLSTNSSERVDTLLENGVPTSSIDL  
IETNHTGTYSCLNGVSPVHLGDCSFEGWIVGNPACTSNFGIREWSYLIEDPAAPHGLCYPGELNNNGELRHLFS  
GIRSFSRTELIPTTSWGEVLDGTTASACRDNTGTNSFYRNLVWFIKKNRYPVISKTYNNTTGRDVLVLWGIHHP  
VSVDETKTLYVNSDPYTLVSTKSWSEKYKLETGVRPGYNGQRSWMKIYWSLIHPGEMITFESNGGFLAPRYGYI  
IEEYKGRIFQSRIRMSRCNTKQTSVGGINTNRTFQNIIDKNALGDCPKYIKSGQLKLATGLRNVPAISNRGLF  
GAIAGFIEGGWPGLINGWYGFQHQNEQGTGIAADKESTQKAIIDQITTKINNIIDKMNGNYDSIRGEFNQVEKRI  
NMLADRIDDVTDIWSYNAKLLVLENDKTLDMHDANVKNLHEQVRRELKDNAIDEGNGCFELLHKCNDSMET  
IRNGTYDHTEYAEESKLRQEIDGISGGGGLNDIFEAQKIEWHERLVPRGSPGSGYIPEAPRDGQAYVRKDGEW  
VLLSTFLGHHHHHH

**>A/mallard duck/Astrakhan/263/1982 (H14N5)**

MVLVNQSHQGFNKEHTSKMVSAIVLYVLLAAAAHSFAAADPGPIICLGHHAVENGTSVKTLTDNHVEVVS  
AKELVETNHTDELCPSPKLVDGQDCDLINGALGSPGCDRLQDTTWVDFIERPTAVDTCYFPDVPDYQSLRSILASSG  
SLEFIAEQFTWNGVVKVDGSSSACLGRGRNSFFSRLNWLTKATNGNYGFINVTKENTGSYVRLYLWGVHHPSSDN  
EQTDLYKVATGRVTVSTRSDQISIVPNIGSRPRVRNQSGRISYWTLVNPGDSIIFNSIGNLIAPRGHYKISKS  
TKSTVLKSDKRIGSCTSPCLTDKGSIQSDKPFQNVSRIAIGNCPKYVKQGSMLLATGMRNIPGKQAKGLFGAIA  
GFIENGWQGLIDGWYGFRHQNAEGTGAADLKSTQAAIDQINGKLNRLIEKTNEKYHQIEKEFEQVEGRIQDLE  
KYVEDTKIDLWSYNAELLVALENQHTIDVTDSEMKNLFEVRRQLRENAEDQNGCFEIFHQCDNNCIESIRNG  
TYDHNIYRDEAINNRIKINPVSGGGGLNDIFEAQKIEWHERLVPRGSPGSGYIPEAPRDGQAYVRKDGEWVLLS  
TFLGHHHHHH

**>A/shearwater/West Australia/2576/1979 (H15N8)**

MVLVNQSHQGFNKEHTSKMVSAIVLYVLLAAAAHSFAAADPGDKICLGHHAVANGTKVNTLTERGVEV  
VNATETVEITGIDKVKCTGKKAVDLGS CGILGTIIGPPQCDLHLEFKADLIIERRNSSDICYPGRFTNEEALRQII  
RESGIDKESMGFRYSGIRTDGATSACKRTVSSFYSEMKWSSSMNNQVFPQLNQTyrNTRKEPALIVWGVHSSSLD  
EQNKLYGTGNKLITVGS SKYQQSFSPSPGARPKVNGQAGRIDFWMLLDPGDVTFTFNAGFIAPDRATFLRSN  
APSGIEYNGKSLGIQSDAQIDESCEGECFYSGGTINSPLPFQNIIDSRAVGKCPRYVKQSSSLPLALGMKNVPEKI  
RTRGLFGAIAAGFIENGWEGLIDGWYGFRHQNAQQGTAADYKSTQAAIDQITGKLNRLIEKTNKQFELIDNEFT  
EVEQQIGNVINWTRDSLTEIWSYNAELLVAMENQHTIDLADSEMKNLYERVRRQLRENAEEDGTGCFEIFHRC  
DQCMESIRNNTYNHTEYRQEALQNRIMINPVSGGGGLNDIFEAQKIEWHERLVPRGSPGSGYIPEAPRDGQAYV  
RKDGEWVLLSTFLGHHHHHH

**>A/black-headed gull/Sweden/4/1999 (H16N3)**

MVLVNQSHQGFNKEHTSKMVSAIVLYVLLAAAAHSFAAADPGDKICIGYLSNNSTDTVDTLTENGVPTSSIDL  
VETNHTGTYSCLNGVSPVHLGDCSFEGWIVGNPSCASNINIREWSYLIEDPNAPHKLCFPGEVDNNGELRHLFS  
GVNSFSRTELIPTTSWGEVLDGTTASACRDNTGTNSFYRNLIWLVNKLNKYPVVKGEYNNTTGRDVLVLWGIHHPD  
TEATANKLYVKNPYTLVSTKEWSRRYELEIGTRIGDGQRSWMKIYWHLMHPGERITFESSGGLLAPRYGYIE  
KYGTGRIFQSGVRLAKCNTKQTSMGGINTNKTQNIERNALGDCPKYIKSGQLKLATGLRNVPSIVERGLFGA  
IAGFIEGGWPGLINGWYGFQHQNEQGTGIAADKTSTQKAINIITTKINNIIEKMNGNYDSIRGEFNQVEKRINM  
IADRVDVAVTDIWSYNAKLLVLIENDRTLDLHDANVRNLHEQIKRALKDNAIDEGDGCFSILHKCNDSMETIR  
NGTYNHEDYKEESQLKRQEIEGISGGGGLNDIFEAQKIEWHERLVPRGSPGSGYIPEAPRDGQAYVRKDGEWV  
LSTFLGHHHHHH

## Supplementary References

1. Ohshima, N. *et al.* Naturally occurring antibodies in humans can neutralize a variety of influenza virus strains, including H3, H1, H2, and H5. *J. Virol.* **85**, 11048-11057 (2011).
2. Connolly, M.L. Analytical molecular surface calculation. *J. Appl. Crystallogr.* **16**, 548-558 (1983).
